# Supplementary material for: Synthesis, structure and properties of trivalent and pentavalent tricarbabismatranes
Source: Royal Society of Chemistry journal article supplement (doi:10.1039/d2cc00751g), 2022-01-01
Supplement: d2cc00751g1.pdf [file d2cc00751g1.pdf]

## Electronic Supplementary Information

### Synthesis, Structure and Properties of Trivalent and Pentavalent Tricarbabismatranes

Shigeru Shimada,\* Shuang-Feng Yin, and Yoong-Kee Choe

#### Table of Contents

|                                                                                                                                                                                                |     |
|------------------------------------------------------------------------------------------------------------------------------------------------------------------------------------------------|-----|
| 1. General                                                                                                                                                                                     | S2  |
| 2. Synthesis of compounds <b>4</b> , <b>5</b> , <b>7a</b> , <b>8b</b> , and <b>9</b> (Figs. S1, S2, and S3)                                                                                    | S2  |
| 3. Synthesis of a mixture of <b>8a</b> and <b>9</b>                                                                                                                                            | S5  |
| 4. <sup>1</sup> H NMR monitoring of the composition change of the mixture of <b>8a</b> and <b>9</b> (Fig. S4)                                                                                  | S5  |
| 5. A plausible reaction pathway for the formation of compound <b>5</b> (Scheme S1)                                                                                                             | S6  |
| 6. Single crystal X-ray structure analysis                                                                                                                                                     | S7  |
| 7. Computational Details (Figs. S5 and S6)                                                                                                                                                     | S7  |
| 8. Cartesian Coordinates of compounds <b>4</b> and <b>8b</b>                                                                                                                                   | S8  |
| 9. References                                                                                                                                                                                  | S11 |
| 10. <sup>1</sup> H and <sup>13</sup> C NMR spectra of <b>4</b> (Figs. S7, S8), <b>5</b> (Figs. S9, S10), <b>7a</b> (Figs. S11, S12), <b>8b</b> (Figs. S13, S14), and <b>9</b> (Figs. S15, S16) | S12 |

## 1. General.

All manipulations of air-sensitive materials were carried out under a nitrogen atmosphere using standard Schlenk techniques or in a glovebox. Anhydrous toluene, Et<sub>2</sub>O and CH<sub>2</sub>Cl<sub>2</sub> were purchased from Kanto Chemicals and degassed before use. CDCl<sub>3</sub>, C<sub>6</sub>D<sub>6</sub>, and DMSO-*d*<sub>6</sub> were dried over molecular sieves and degassed. XeF<sub>2</sub> was purchased from Acros Organics and used as received. NMR spectra were recorded on Jeol LA500 spectrometer or Bruker Avance Neo 400 spectrometer. Chemical shifts are reported in  $\delta$  (ppm) and are referenced to internal tetramethylsilane (0.0 ppm) or the (residual) solvent signals for <sup>1</sup>H (7.16 ppm for C<sub>6</sub>D<sub>6</sub>) and <sup>13</sup>C (128.06 ppm for C<sub>6</sub>D<sub>6</sub>).<sup>S1</sup> Coupling constants were reported in Hertz. Elemental analysis was performed by the Analytical Center at the National Institute of Advanced Industrial Science and Technology. Tris(2-bromobenzyl)amine was synthesized according to the literature procedure.<sup>S2</sup>

## 2. Synthesis of compounds 4, 5, 7a, 8b, and 9

### Bismatrane 4.

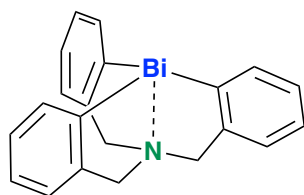

A hexane solution of *n*BuLi (1.57 M, 1.90 mL, 3.0 mmol) was added dropwise to a dry Et<sub>2</sub>O solution (15 mL) of tris(2-bromobenzyl)amine **3** (521 mg, 0.994 mmol) at –30 °C. The solution was stirred for 30 min at the same temperature and then gradually warmed to rt. The resulting solution was added to BiCl<sub>3</sub> (314 mg, 0.996 mmol) in Et<sub>2</sub>O (5 mL) at –78 °C. The reaction mixture was kept at –78 °C for 3 h and then warmed to rt naturally and stirred overnight. After filtration, the filtrate was concentrated under vacuum to give a solid residue (360 mg). The residue was extracted with Et<sub>2</sub>O (3 mL) and the extract was concentrated under vacuum to give bismatrane **4** as a colorless solid (130 mg, 27% yield). A similar experiment in larger scale (**3**, 3.1 g; BiCl<sub>3</sub>, 1.86 g) afforded **4** in 25% isolated yield (0.72 g).

<sup>1</sup>H NMR (CDCl<sub>3</sub>, 499.1 MHz):  $\delta$  3.67 (6H, s), 7.23–7.26 (3H, m), 7.29–7.33 (6H, m), 7.99 (3H, d, *J* = 7.3). <sup>1</sup>H NMR (C<sub>6</sub>D<sub>6</sub>, 499.1 MHz):  $\delta$  3.34 (6H, s), 7.08 (3H, d, *J* = 7.3), 7.15 (3H, dt, *J* = 1.4, 7.3), 7.21 (3H, dt, *J* = 1.3, 7.1), 7.95 (3H, dd, *J* = 1.2, 7.1). <sup>13</sup>C NMR (CDCl<sub>3</sub>, 125.4 MHz):  $\delta$  58.5 (CH<sub>2</sub>), 128.1, 128.77, 128.84, 138.0, 145.2, 159.4 (br, CBi). <sup>13</sup>C NMR (C<sub>6</sub>D<sub>6</sub>, 125.4 MHz):  $\delta$  58.6 (CH<sub>2</sub>), 128.4, 129.24, 129.26, 138.5, 145.6, 159.3 (br, CBi). Anal. Calcd for C<sub>21</sub>H<sub>18</sub>BiN: C, 51.12; H, 3.68; N, 2.84%. Found: C, 51.23; H, 3.61; N, 2.61%. HRMS Calcd for: 493.1243. Found: 493.1185

### Oxidation product 5.

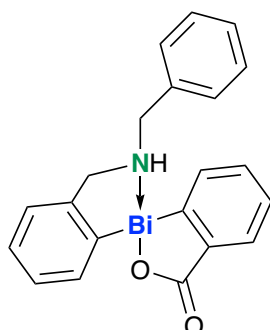

A CH<sub>2</sub>Cl<sub>2</sub> solution of bismatrane **4** (20.0 mg, 0.0405 mmol) was stirred under air for 2 days to give colorless precipitates, which were separated by filtration and dried under vacuum to give compound **5** as a colorless solid (20.0 mg, 94% yield). Single crystals suitable for X-ray analysis were obtained by the recrystallization from a THF/heptane mixture.

<sup>1</sup>H NMR (DMSO-*d*<sub>6</sub>, 499.1 MHz): δ 4.04 (2H, br d, *J* = 5.9, NCH<sub>2</sub>), 4.26 (2H, br d, *J* = 4.9, NCH<sub>2</sub>), 5.68 (1H, quint, *J* = 5.7, NH), 7.25 (1H, dt, *J* = 1.2, 7.4), 7.33-7.52 (8H, m), 7.66 (1H, dt, *J* = 1.2, 7.3), 7.86 (2H, t, *J* = 7.2), 8.00 (1H, d, *J* = 7.3). <sup>13</sup>C NMR (DMSO-*d*<sub>6</sub>, 125.4 MHz): δ 52.3 (CH<sub>2</sub>), 55.8 (CH<sub>2</sub>), 127.0, 127.5, 127.9, 128.4, 128.6 (2C), 129.2, 129.3 (2C), 133.5, 134.4, 135.2, 135.4, 137.1, 140.8, 148.9, 175.0, 178.5, 181.0. Anal. Calcd for C<sub>21</sub>H<sub>18</sub>BiNO<sub>2</sub>: C, 48.01; H, 3.45; N, 2.67%. Found: C, 47.66; H, 3.43; N, 2.46%.

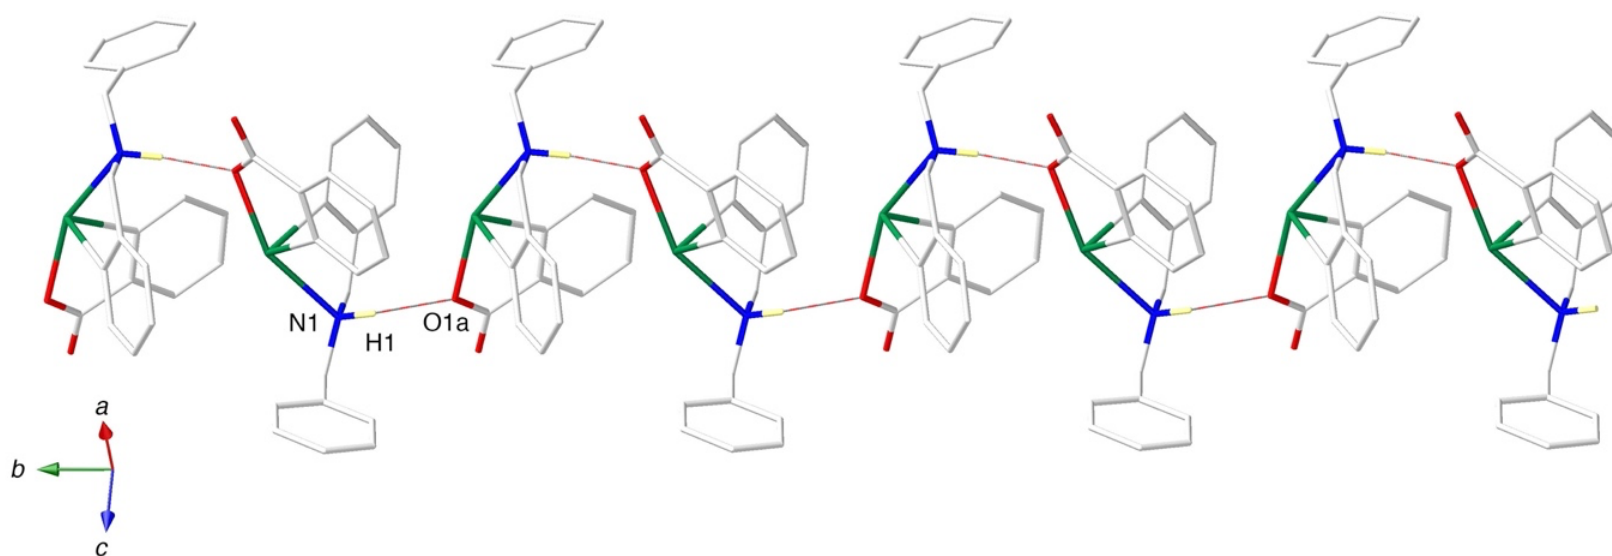

**Fig. S1** 1D arrangement of compound **5** in the crystal through intermolecular hydrogen bonds (N1···O1a (2.858(4) Å), N1-H1-O1a (142.4°)). Symmetry transformations:  $a = 3/2 - x, -1/2 + y, 3/2 - z$ . Similar 1D arrangement was also observed in the crystal **5**·THF (N1···O1a (2.827(4) Å), N1-H1-O1a (154.7°))

### Compound 7a

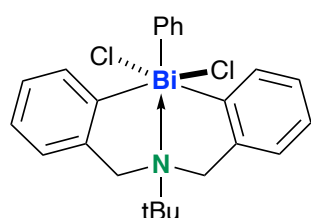

To a dry Et<sub>2</sub>O solution (10 mL) of dibenzazabismocine **6a** (81.2 mg, 0.151 mmol) was added SO<sub>2</sub>Cl<sub>2</sub> (12 μl, 0.15 mmol) at -196 °C. The mixture was warmed to -78 °C and stirred for 1 h at the same temperature. Then the volatiles were removed under vacuum at rt to leave a colorless solid. The solid was washed with Et<sub>2</sub>O and dried under vacuum to give **7a** (84.5 mg, 92% yield). Single crystals suitable for X-ray analysis were obtained by the recrystallization from Et<sub>2</sub>O.

<sup>1</sup>H NMR (CDCl<sub>3</sub>, 499.1 MHz): δ 1.07 (9H, s), 4.62 (2H, d, *J* = 15.8), 4.70 (2H, d, *J* = 15.9), 7.38 (2H, tt, *J* = 2.0, 7.3), 7.42 (2H, tt, *J* = 1.3, 7.1), 7.45 (2H, dd, *J* = 2.0, 7.4), 7.59 (1H, tt, *J* = 1.3, 7.4), 7.71 (2H, d, *J* = 7.4), 7.74 (2H, t, *J* = 7.6), 8.71 (2H, dd, *J* = 1.0, 8.3). <sup>13</sup>C NMR (CDCl<sub>3</sub>, 125.4 MHz): δ 26.3, 56.6, 59.7, 128.7, 129.0, 129.3, 129.8, 130.15, 130.19, 136.3, 141.7, 146.6, 162.7. Anal. Calcd for C<sub>24</sub>H<sub>16</sub>BiCl<sub>2</sub>N: C, 47.38; H, 4.31; N, 2.30%. Found: C, 47.23; H, 4.22; N, 2.07%.

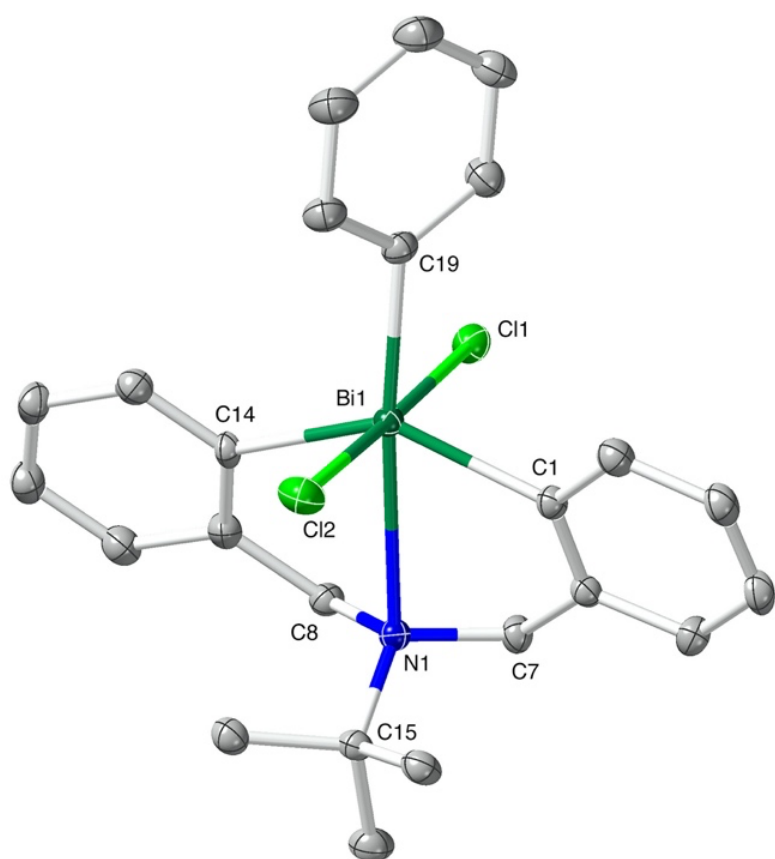

**Fig. S2** Molecular structure of **7a** determined by single crystal X-ray diffraction (thermal ellipsoids are shown at 50% probability level). Hydrogens are omitted for clarity. Selected bond lengths (Å) and angles (°): Bi1–Cl1 2.6261(8); Bi1–Cl2 2.5781(8); Bi1–N1 2.838(3); Bi1–C1 2.199(3); Bi1–C14 2.201(3); Bi1–C19 2.234(3); Cl1–Bi1–Cl2 178.48(3); Cl1–Bi1–N1 84.96(6); Cl2–Bi1–N1 95.51(6); Cl1–Bi1–C1 88.54(9); Cl1–Bi1–C14 88.12(8); Cl1–Bi1–C19 89.21(9); Cl2–Bi1–C1 92.98(9); Cl2–Bi1–C14 90.67(9); Cl2–Bi1–C19 90.39(9); N1–Bi1–C1 70.59(10); N1–Bi1–C14 70.66(10); N1–Bi1–C19 173.42(10); C1–Bi1–C14 141.25(12); C1–Bi1–C19 106.28(12); C14–Bi1–C19 112.26(12).

### Difluorobismatrane **8b**

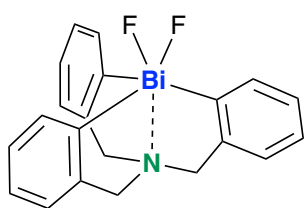

To a stirred  $\text{CH}_2\text{Cl}_2$  (30 mL) solution of bismatrane **4** (200 mg, 0.405 mmol) was added a  $\text{CH}_2\text{Cl}_2$  solution (20 mL) of  $\text{XeF}_2$  (75.5 mg, 0.446 mmol) at  $-94^\circ\text{C}$  under  $\text{N}_2$ . The resulting mixture was stirred at  $-94^\circ\text{C}$  for 1 h and warmed to rt naturally. The solvent was removed under vacuum to give a pale yellow solid residue. Recrystallization from a mixture of  $\text{CH}_2\text{Cl}_2$  and heptane gave bismatrane **8b** as yellow crystals (200 mg, 93% yield).

Mp.:  $162\text{--}163.3^\circ\text{C}$ .  $^1\text{H}$  NMR ( $\text{CDCl}_3$ , 499.1 MHz):  $\delta$  4.19 (6H, s), 7.32 (3H, d,  $J = 7.3$ ), 7.37 (3H, t,  $J = 7.3$ ), 7.54 (3H, t,  $J = 7.0$ ), 8.41 (3H, d,  $J = 7.6$ ).  $^{13}\text{C}$  NMR ( $\text{CDCl}_3$ , 125.4 MHz):  $\delta$  56.8 ( $\text{CH}_2$ ), 128.5, 130.4, 131.1, 136.6, 140.3, 159.7 (br, C<sub>Bi</sub>). Anal. Calcd for  $\text{C}_{21}\text{H}_{18}\text{BiF}_2\text{N}$ : C, 47.47; H, 3.41; N, 2.64%. Found: C, 47.16; H, 3.21; N, 2.40%.

### Chlorination of **4** with $\text{SO}_2\text{Cl}_2$ ; formation of **9**

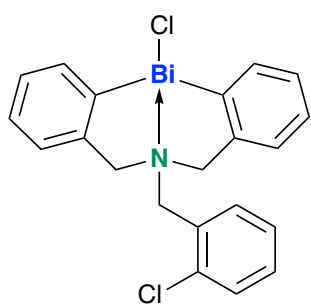

To a dry  $\text{Et}_2\text{O}$  solution (5 mL) of bismatrane **4** (72.0 mg, 0.146 mmol) was added  $\text{SO}_2\text{Cl}_2$  (12  $\mu\text{L}$ , 0.15 mmol) at  $-196^\circ\text{C}$ . The mixture was warmed to  $-78^\circ\text{C}$  and stirred for 2 h at the same temperature. Then the volatiles were removed under vacuum at rt to leave a yellowish solid. Then the solid residue was extracted with  $\text{Et}_2\text{O}$  (3 mL) and the  $\text{Et}_2\text{O}$  extract was evacuated to

give colorless solid (27 mg), which mainly consist of compound **9**. Single crystals suitable for X-ray analysis were obtained by the recrystallization from Et<sub>2</sub>O.

<sup>1</sup>H NMR (CDCl<sub>3</sub>, 499.1 MHz): δ 4.16 (2H, s, NCH<sub>2</sub>C<sub>6</sub>H<sub>4</sub>Cl), 4.21 (2H, d, *J* = 14.6), 4.37 (2H, d, *J* = 14.6), 7.27-7.37 (5H, m), 7.39-7.48 (3H, m), 7.53 (2H, t, *J* = 7.4), 8.65 (2H, dd, *J* = 1.1, 7.4). <sup>13</sup>C NMR (CDCl<sub>3</sub>, 100.6 MHz): δ 56.7 (CH<sub>2</sub>), 62.8 (2C, CH<sub>2</sub>), 127.3 (CH), 128.2 (2C, CH), 128.3 (2C, CH), 130.66 (CH), 130.72 (CH), 131.4 (2C, CH), 132.1, 133.4 (CH), 135.6, 138.5 (2C, CH), 147.9, 172.1.

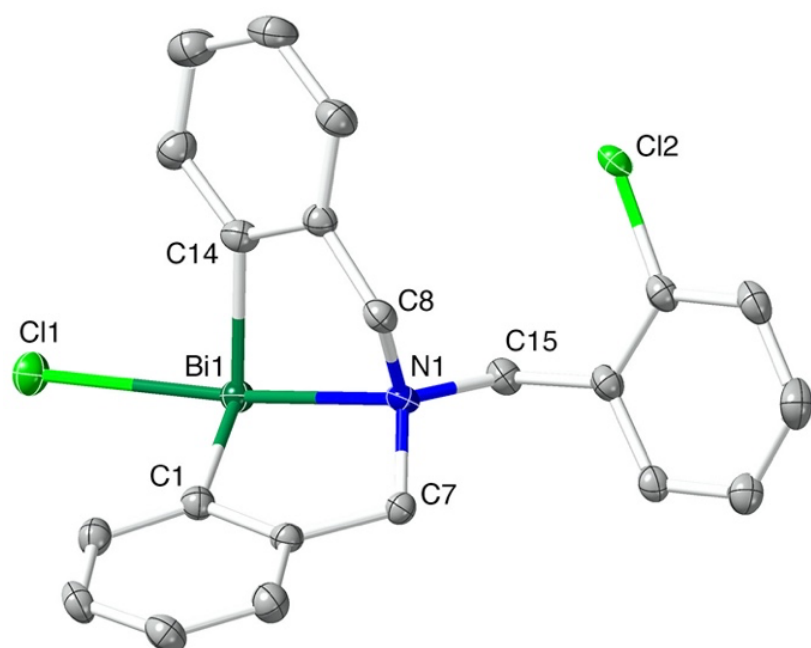

**Fig. S3** Molecular structure of **9** determined by single crystal X-ray diffraction (thermal ellipsoids are shown at 50% probability level). Hydrogens are omitted for clarity. Selected bond lengths (Å) and angles (°): Bi1–C11 2.6185(10); Bi1–N1 2.555(3); Bi1–C1 2.258(4); Bi1–C14 2.241(4); Cl1–Bi1–N1 154.57(8); Cl1–Bi1–C1 90.84(10); Cl1–Bi1–C14 90.94(10); N1–Bi1–C1 72.27(12); N1–Bi1–C14 73.78(12); C1–Bi1–C14 99.23(13).

### 3. Synthesis of a mixture of **8a** and **9**

To a dry CH<sub>2</sub>Cl<sub>2</sub> solution (6 mL) of bismatrane **4** (120 mg, 0.243 mmol) was added SO<sub>2</sub>Cl<sub>2</sub> (35 μL, 0.43 mmol) at –78 °C. The mixture was gradually warmed to –10 °C during 2.3 h with stirring. Then the volatiles were removed under vacuum with keeping the temperature between –10 and –5 °C to give a pale yellow solid residue. The product was dissolved in dry CH<sub>2</sub>Cl<sub>2</sub> (3 mL), and dry hexane (2 mL) was layered over the solution. The mixture was kept at –35 °C overnight. The supernatant was removed. The resulted pale yellow solid was washed with CH<sub>2</sub>Cl<sub>2</sub>/hexane (1/1, 2 × 0.5 mL) and dried under vacuum (yield, 129 mg). <sup>1</sup>H NMR analysis of the solid suggested that it was a mixture of **8a** and **9** (**8a**/**9** = ca. 83/17).

The following NMR data was obtained from the spectra of a mixture of **8a** and **9** (ca. 3:1).

**8a**: <sup>1</sup>H NMR (CDCl<sub>3</sub>, 400.1 MHz): δ 4.87 (6H, s, NCH<sub>2</sub>), 7.57 (3H, t, *J* = 7.5), 7.65 (3H, t, *J* = 7.6), 7.83 (3H, d, *J* = 7.6), 7.96 (3H, d, *J* = 7.6). <sup>13</sup>C NMR (CDCl<sub>3</sub>, 100.6 MHz): δ 57.2, 132.1, 132.5, 133.5 (2C), 141.8, 142.4.

### 4. <sup>1</sup>H NMR monitoring of the composition change of the mixture of **8a** and **9**

The composition change (conversion of **8a** to **9**) of a mixture of **8a** and **9** in CDCl<sub>3</sub> (initial ratio of **8a** and **9** was ca. 83:17) was monitored by <sup>1</sup>H NMR analysis at 20 °C for 6 days and then at 40 °C for 47 h. The change of the <sup>1</sup>H NMR spectra is shown in Fig S4.



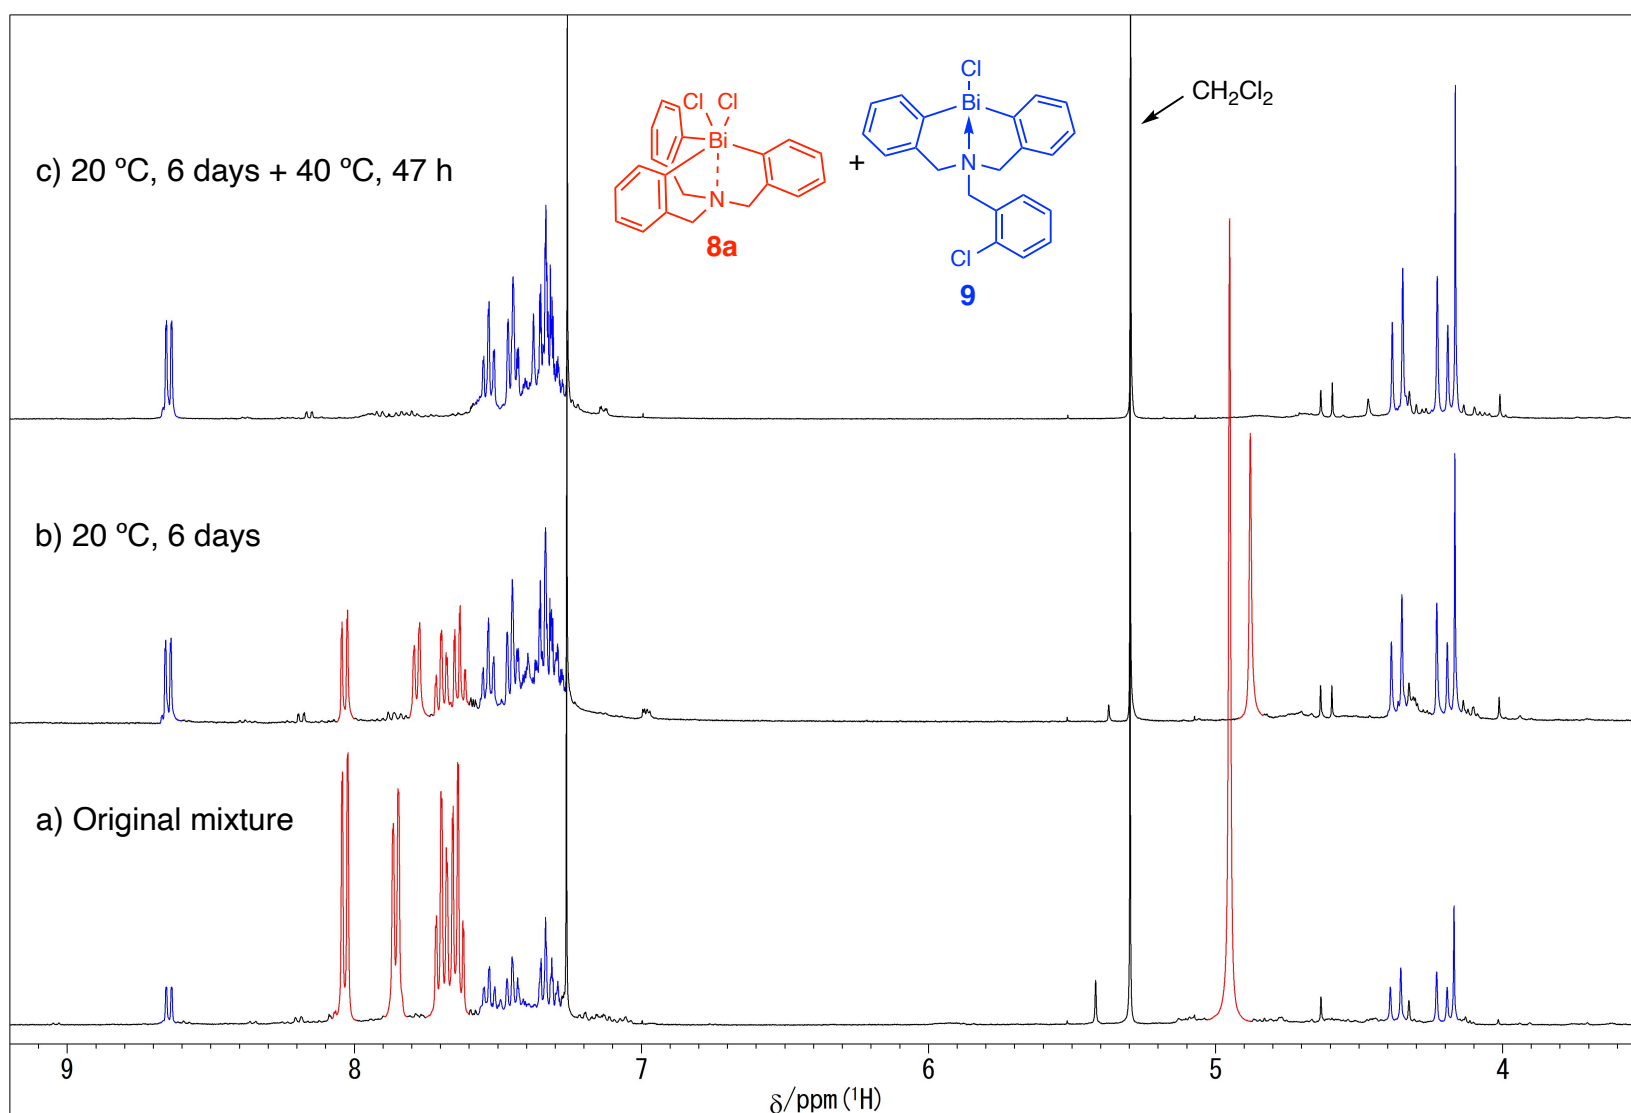

**Fig. S4** Monitoring of the conversion of **8a** to **9** by  $^1\text{H}$  NMR spectroscopy ( $\text{CDCl}_3$ , 400 MHz): a) Original mixture of **8a** and **9** in ca. 83:17 ratio. b) After 6 days at 20 °C. c) After 6 days at 20 °C and 47 h at 40 °C; showing almost complete conversion of **8a**.

### 5. A plausible reaction pathway for the formation of compound **5**

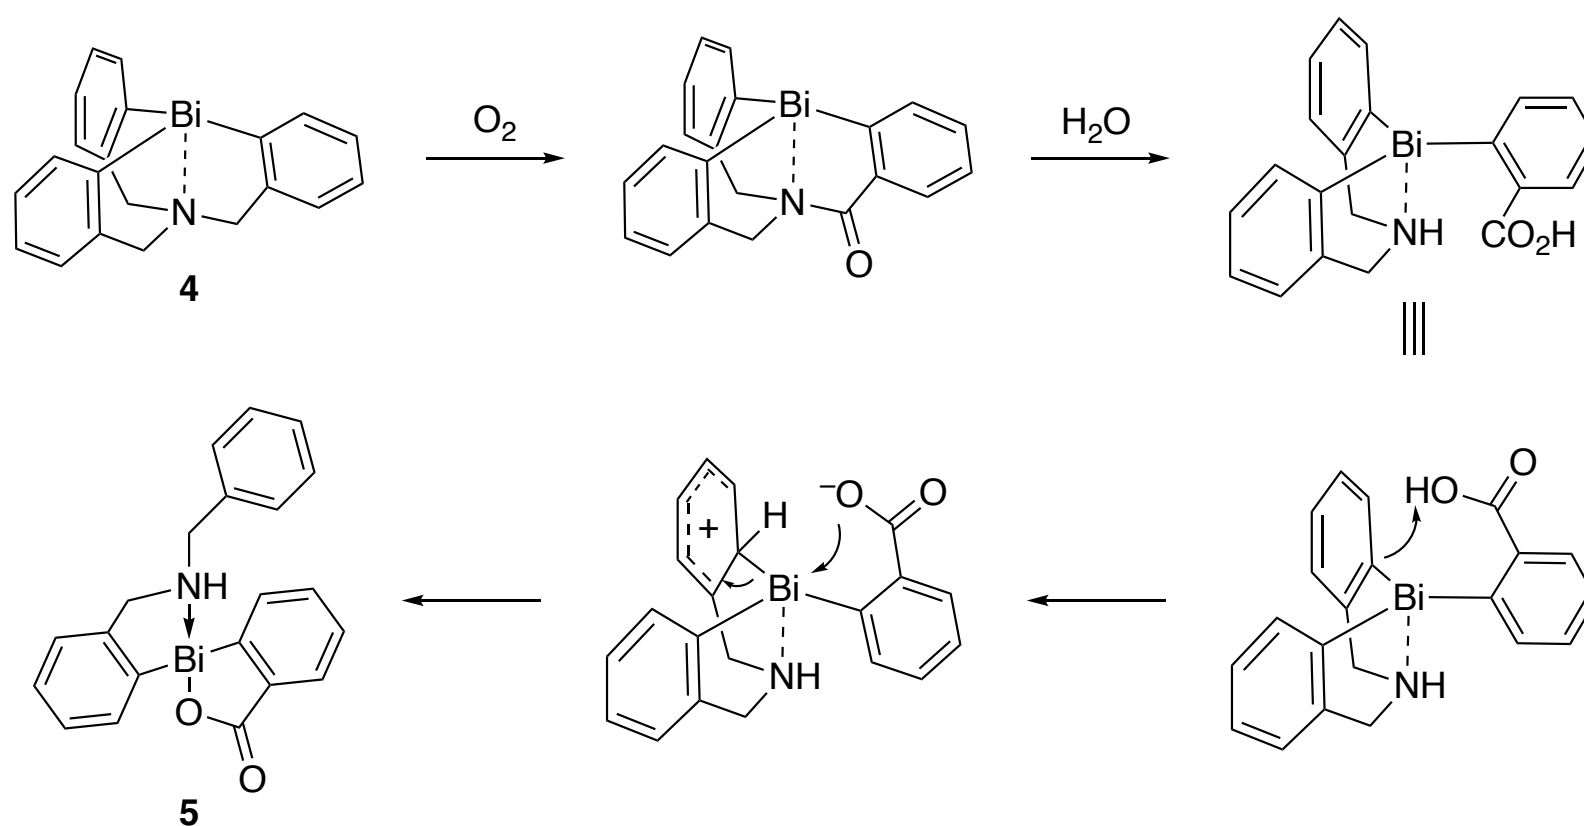

**Scheme. S1** A plausible reaction pathway for the formation of compound **5** from bismatrane **4**.

## 6. Single crystal X-ray structure analysis

Single crystals of **5**, **5**·THF, **7a**, **8b** and **9** were covered with paratone-8236 oil and mounted on a glass fiber. Data collection was performed on a Bruker Smart Apex CCD diffractometer (Mo K $\alpha$  radiation, graphite monochromator). The determination of crystal class and unit cell parameters was carried out with the CrysAlisPro program package.<sup>S3</sup> The raw frame data were processed using CrysAlisPro to yield the reduction data file. Structure solution and refinement were performed using Olex2 software package<sup>S4</sup> with SHELXT and SHELXL programs.<sup>S5</sup>

CCDC 2144020 – 2144024 respectively contain the supplementary crystallographic data for **8b**, **5**, **5**·THF, **7a**, and **9**. These data can be obtained free of charge from The Cambridge Crystallographic Data Centre at [www.ccdc.cam.ac.uk/data\\_request/cif](http://www.ccdc.cam.ac.uk/data_request/cif).

## 7. Computational Details

Geometry optimizations and frequency calculations were performed using the density functional theory (DFT), as implemented in the Gaussian 16 quantum chemistry package.<sup>S6</sup> For the DFT calculations, the  $\omega$ B97X-D functional was used.<sup>S7</sup> As for the basis sets, we used def2-SVP basis sets where core electrons of Bi were represented by effective core potential.<sup>S8</sup> To investigate bonding in the molecules, we carried out the Mayer bond order analysis.<sup>S9</sup>

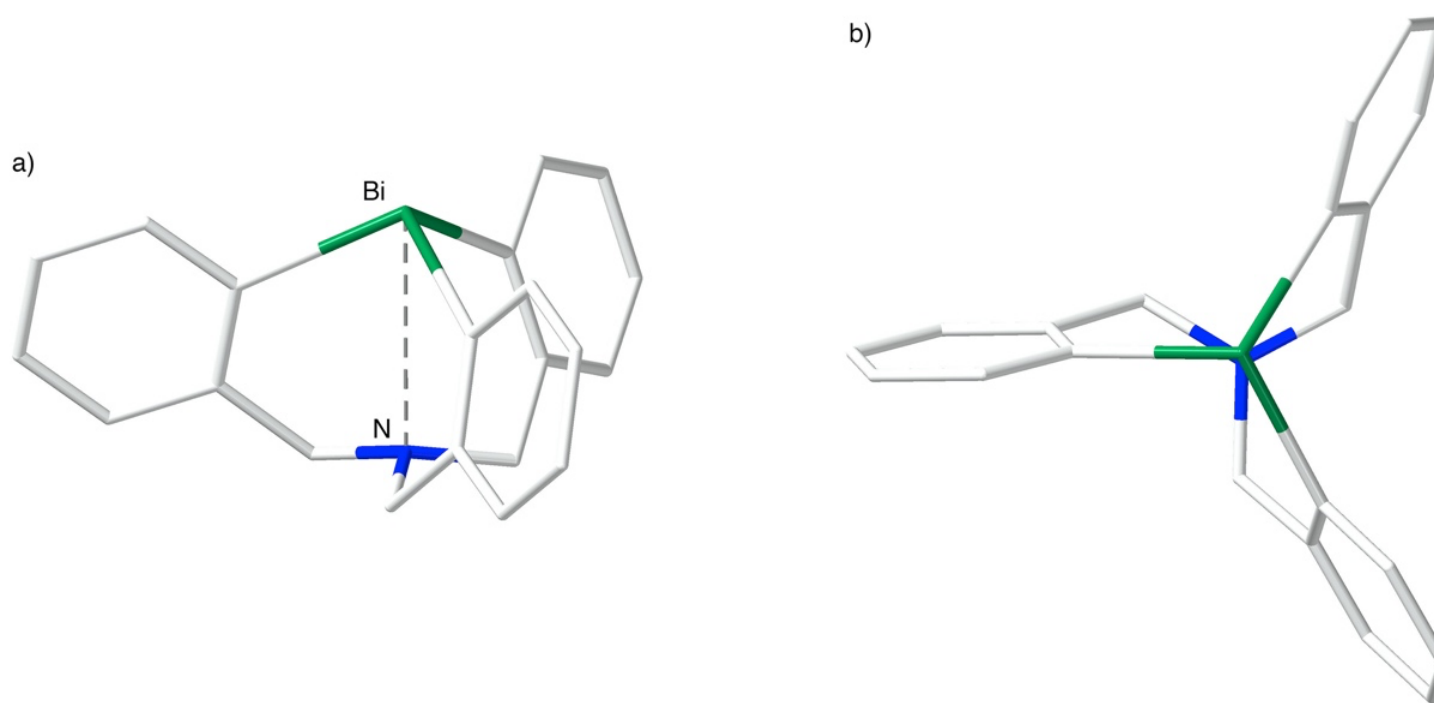

**Fig. S5** Two views of the molecular structure of compound **4** obtained by the DFT calculations.

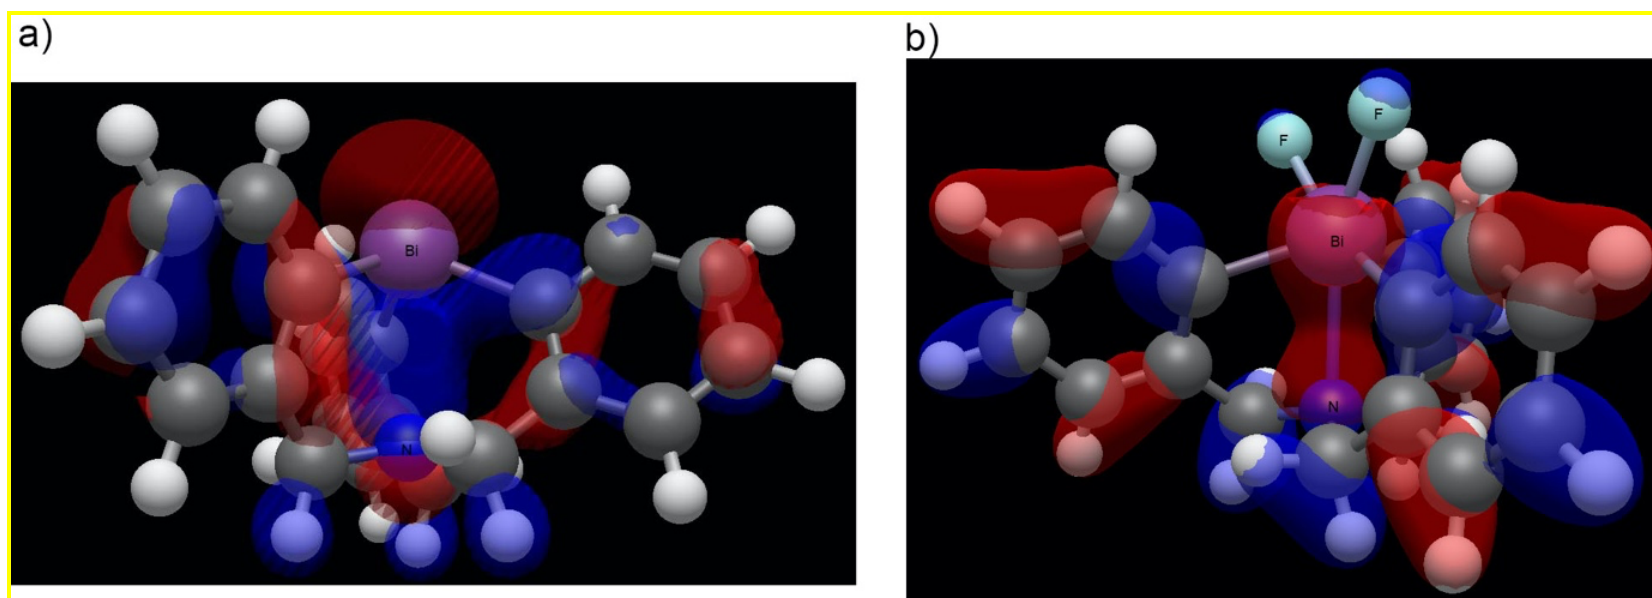

**Fig. S6** Views of molecular orbitals relating to the Bi–N interactions. a) A view of MO85 (HOMO–1) for compound **4**. b) A view of MO55 (HOMO–41) for compound **8b**.

## 8. Coordinates of compounds **4** and **8b** in XYZ format

### Compound **4**

41

|    |          |          |           |
|----|----------|----------|-----------|
| H  | 2.801421 | 6.338994 | -0.081929 |
| Bi | 6.748843 | 5.667738 | 3.371146  |
| C  | 7.674737 | 3.627862 | 3.821928  |
| C  | 8.785635 | 3.302925 | 3.036860  |
| C  | 9.027817 | 1.192010 | 4.168336  |
| C  | 7.922653 | 1.506386 | 4.957796  |
| C  | 7.243245 | 2.717750 | 4.800105  |
| C  | 6.067869 | 3.040733 | 5.701322  |
| C  | 4.296507 | 4.727055 | 5.799837  |
| C  | 5.147832 | 5.891638 | 6.265408  |
| C  | 4.905255 | 6.468338 | 7.515374  |
| C  | 5.646645 | 7.561841 | 7.960384  |
| C  | 6.650852 | 8.088353 | 7.153296  |
| C  | 6.899888 | 7.513742 | 5.905548  |
| C  | 6.163362 | 6.415655 | 5.449654  |
| C  | 4.729830 | 5.102178 | 2.461893  |
| C  | 4.316164 | 5.915101 | 1.401599  |
| C  | 3.108282 | 5.687537 | 0.739606  |
| C  | 2.298906 | 4.627986 | 1.138813  |
| C  | 2.702190 | 3.810287 | 2.193342  |
| C  | 3.912509 | 4.031063 | 2.856885  |
| C  | 4.334841 | 3.097686 | 3.974138  |
| H  | 9.142162 | 4.002293 | 2.272241  |
| H  | 7.576305 | 0.793725 | 5.712494  |



|   |           |          |          |
|---|-----------|----------|----------|
| H | 4.121394  | 6.049911 | 8.154029 |
| H | 5.442319  | 7.996827 | 8.941324 |
| H | 7.242793  | 8.941582 | 7.492554 |
| H | 7.692607  | 7.941525 | 5.281459 |
| H | 4.942663  | 6.752349 | 1.073896 |
| H | 1.348519  | 4.439204 | 0.634495 |
| H | 2.061526  | 2.982256 | 2.511653 |
| H | 5.010098  | 2.334714 | 3.551866 |
| H | 3.449343  | 2.548879 | 4.359377 |
| H | 6.432071  | 3.660753 | 6.537615 |
| H | 5.675591  | 2.106298 | 6.155904 |
| H | 3.485685  | 5.122246 | 5.165101 |
| H | 3.802405  | 4.250654 | 6.673125 |
| N | 5.053862  | 3.792469 | 5.009494 |
| C | 9.462868  | 2.093219 | 3.201115 |
| H | 10.324277 | 1.856525 | 2.572291 |
| H | 9.543558  | 0.239035 | 4.306415 |

### Compound 8b

43

|    |          |          |           |
|----|----------|----------|-----------|
| H  | 2.849901 | 6.131300 | -0.302676 |
| Bi | 6.475532 | 5.605629 | 3.508492  |
| C  | 7.639901 | 3.676411 | 3.821106  |
| C  | 8.763331 | 3.401469 | 3.042113  |
| C  | 9.003016 | 1.268293 | 4.149634  |
| C  | 7.884921 | 1.550258 | 4.931867  |
| C  | 7.196821 | 2.757714 | 4.780510  |
| C  | 6.022202 | 3.086870 | 5.674454  |
| C  | 4.296450 | 4.810172 | 5.826358  |
| C  | 5.198010 | 5.911554 | 6.352412  |
| C  | 5.003757 | 6.449840 | 7.627740  |
| C  | 5.797798 | 7.500691 | 8.082750  |
| C  | 6.793879 | 8.032049 | 7.264994  |
| C  | 6.999364 | 7.507217 | 5.989257  |
| C  | 6.217397 | 6.441118 | 5.553589  |
| C  | 4.659124 | 5.053203 | 2.361393  |
| C  | 4.299383 | 5.836612 | 1.266692  |
| C  | 3.137145 | 5.528630 | 0.561459  |
| C  | 2.332918 | 4.467820 | 0.977012  |
| C  | 2.683497 | 3.718028 | 2.097564  |
| C  | 3.857449 | 3.998300 | 2.804280  |
| C  | 4.250480 | 3.155557 | 4.000559  |

|   |           |          |          |
|---|-----------|----------|----------|
| F | 8.131127  | 6.115613 | 2.370593 |
| F | 6.022528  | 7.568082 | 2.911603 |
| H | 9.098634  | 4.144266 | 2.318036 |
| H | 7.539539  | 0.823115 | 5.672612 |
| H | 4.217532  | 6.042733 | 8.269776 |
| H | 5.635036  | 7.909236 | 9.082308 |
| H | 7.410172  | 8.861853 | 7.617169 |
| H | 7.759973  | 7.939614 | 5.335634 |
| H | 4.915301  | 6.696576 | 0.998112 |
| H | 1.414106  | 4.233199 | 0.435227 |
| H | 2.033985  | 2.905081 | 2.434616 |
| H | 4.871802  | 2.317080 | 3.645712 |
| H | 3.349806  | 2.706947 | 4.462364 |
| H | 6.385373  | 3.668898 | 6.536765 |
| H | 5.571570  | 2.162839 | 6.085476 |
| H | 3.494098  | 5.262617 | 5.219196 |
| H | 3.801934  | 4.283039 | 6.665611 |
| N | 5.039662  | 3.898787 | 4.971513 |
| C | 9.443957  | 2.194391 | 3.206676 |
| H | 10.321133 | 1.978488 | 2.592634 |
| H | 9.529457  | 0.319811 | 4.276807 |

## 9. References:

- S1 G. R. Fulmer, A. J. M. Miller, N. H. Sherden, H. E. Gottlieb, A. Nudelman, B. M. Stoltz, J. E. Bercaw, K. I. Goldberg, *Organometallics*, 2010, **29**, 2176-2179.
- S2 Q. Chen, C. E. Buss, V. G. Young and S. Fox, *J. Chem. Crystallogr.*, 2005, **35**, 177-181.
- S3 CrysAlisPro 1.171.40.67a. Rigaku OD, 2019.
- S4 Olex2 1.5: O. V. Dolomanov, L. J. Bourhis, R. J. Gildea, J. A. K. Howard and H. Puschmann, *J. Appl. Crystallogr.* **2009**, *42*, 339.
- S5 Shelxl Version 2018/3: G. M. Sheldrick, *Acta Crystallogr., Sect. A: Found. Crystallogr.* **2008**, *64*, 112.
- S6 M. J. Frisch , G. W. Trucks , H. B. Schlegel , G. E. Scuseria , M. A. Robb , J. R. Cheeseman , G. Scalmani , V. Barone , G. A. Petersson , H. Nakatsuji , X. Li , M. Caricato , A. V. Marenich , J. Bloino , B. G. Janesko , R. Gomperts , B. Mennucci , H. P. Hratchian , J. V. Ortiz , A. F. Izmaylov , J. L. Sonnenberg , D. Williams , F. Ding , F. Lipparini , F. Egidi , J. Goings , B. Peng , A. Petrone , T. Henderson , D. Ranasinghe , V. G. Zakrzewski , J. Gao , N. Rega , G. Zheng , W. Liang , M. Hada , M. Ehara , K. Toyota , R. Fukuda , J. Hasegawa , M. Ishida , T. Nakajima , Y. Honda , O. Kitao , H. Nakai , T. Vreven , K. Throssell , J. A. Montgomery Jr , J. E. Peralta , F. Ogliaro , M. J. Bearpark , J. J. Heyd , E. N. Brothers , K. N. Kudin , V. N. Staroverov , T. A. Keith , R. Kobayashi , J. Normand , K. Raghavachari , A. P. Rendell , J. C. Burant , S. S. Iyengar , J. Tomasi , M. Cossi , J. M. Millam , M. Klene , C. Adamo , R. Cammi , J. W. Ochterski , R. L. Martin , K. Morokuma , O. Farkas , J. B. Foresman and D. J. Fox , *Gaussian 16* , Wallingford, CT, 2016.
- S7 J.-D. Chai and M. Head-Gordon , *Phys. Chem. Chem. Phys.*, 2008, **10** , 6615 —6620.
- S8 F. Weigend and R. Ahlrichs, *Phys. Chem. Chem. Phys.*, 2005, *7*, 3297–3305.
- S9 (a) I. Mayer *Chem. Phys. Lett.*, 1983, **97** , 270 (b) I. Mayer *Int. J. Quantum Chem.*, 1984, **26** , 151

10.  $^1\text{H}$  and  $^{13}\text{C}$  NMR spectra of compounds 4, 5, 7a, 8b, and 9

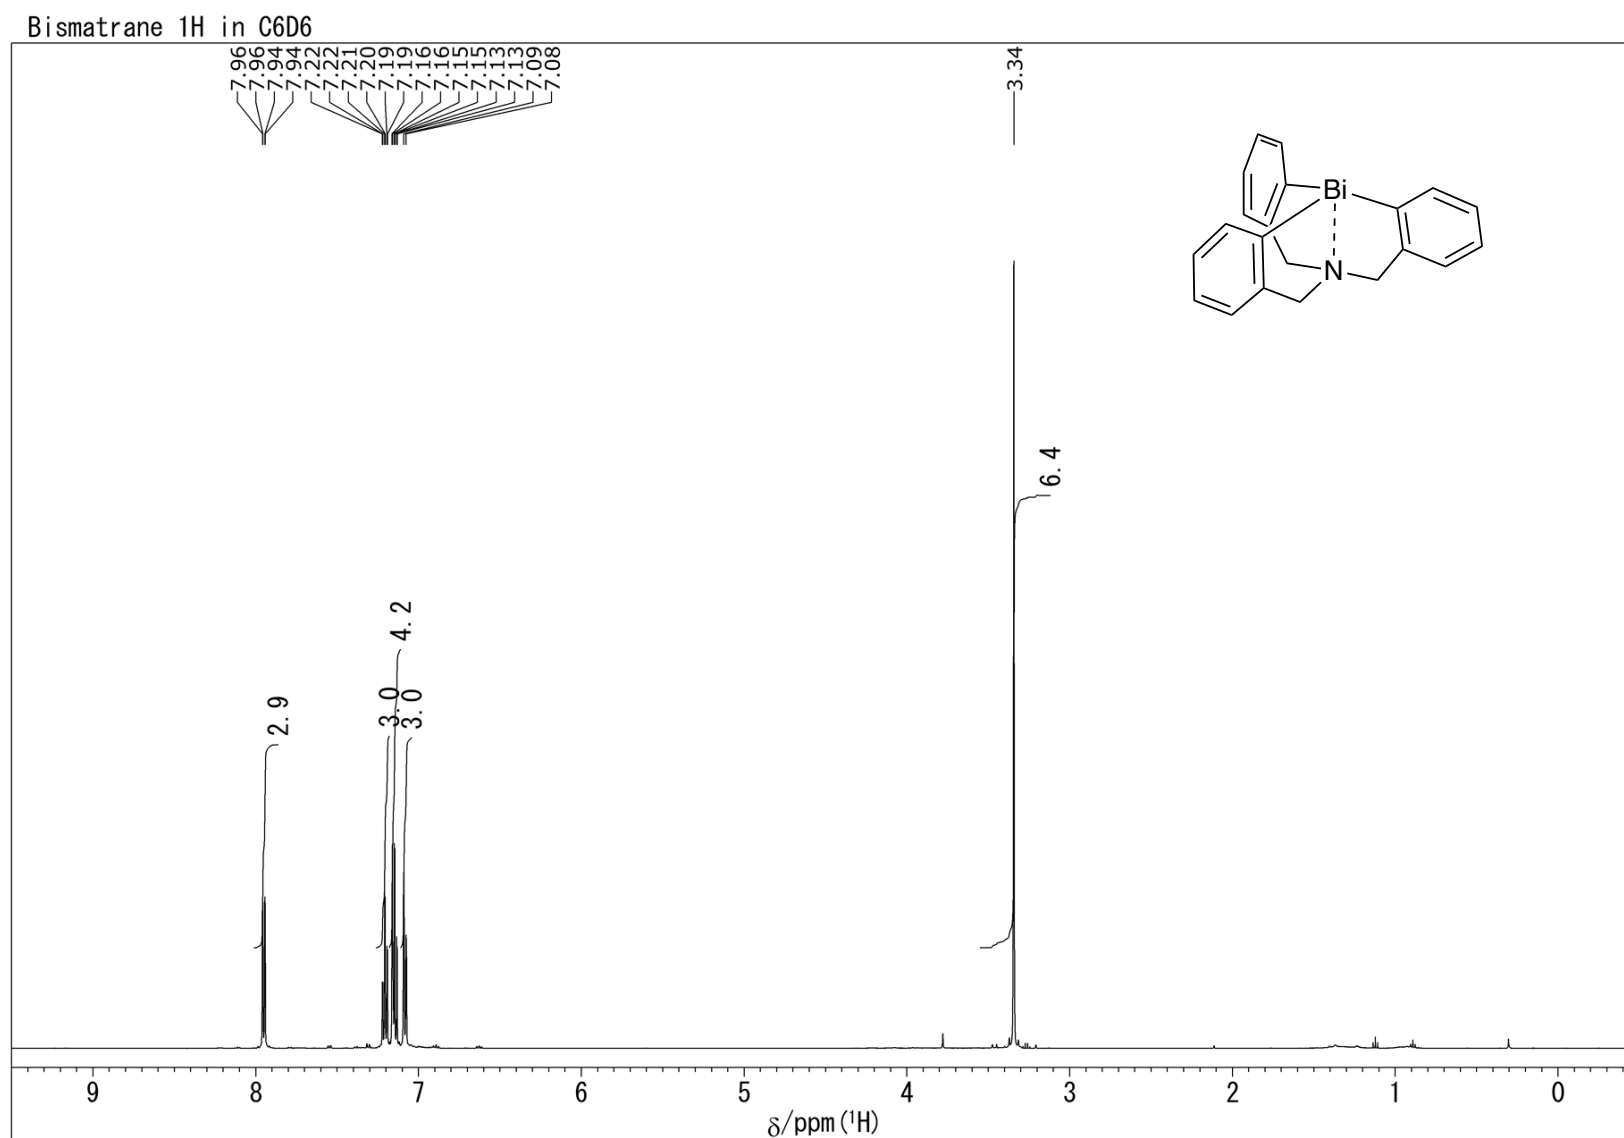

Fig. S7  $^1\text{H}$  NMR ( $\text{C}_6\text{D}_6$ , 499.1 MHz) spectrum of compound 4.

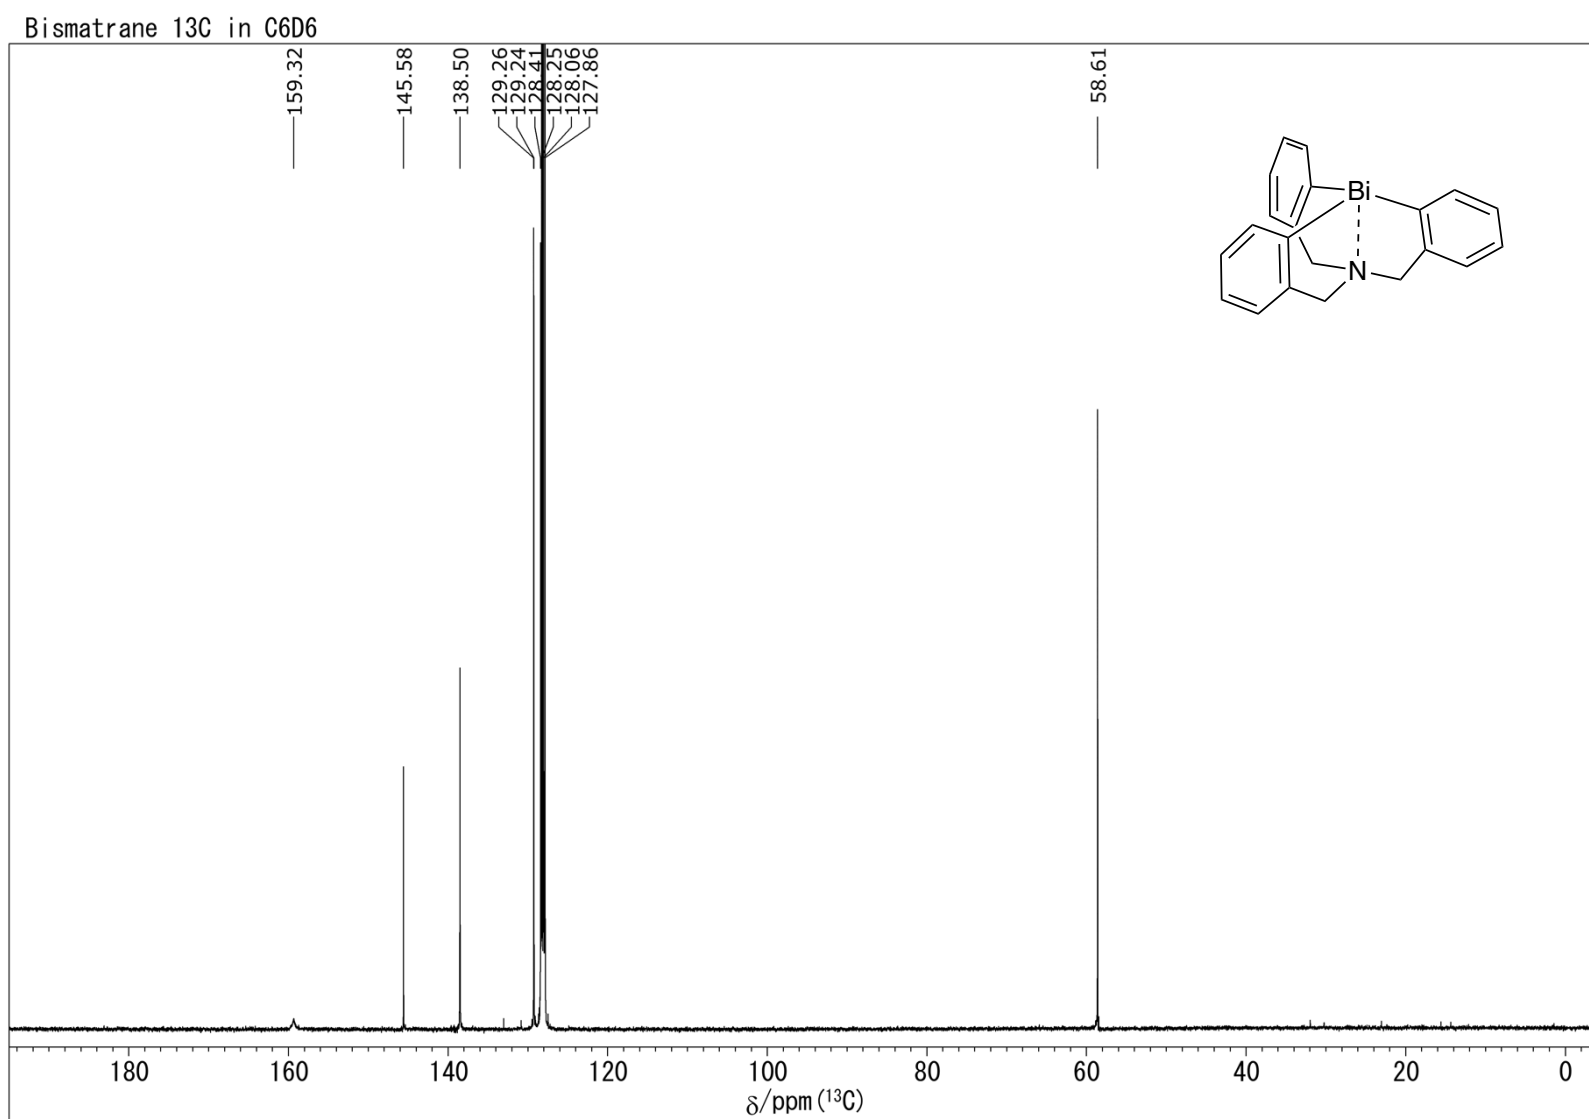

Fig. S8  $^{13}\text{C}$  NMR ( $\text{C}_6\text{D}_6$ , 125.4 MHz) spectrum of compound 4.

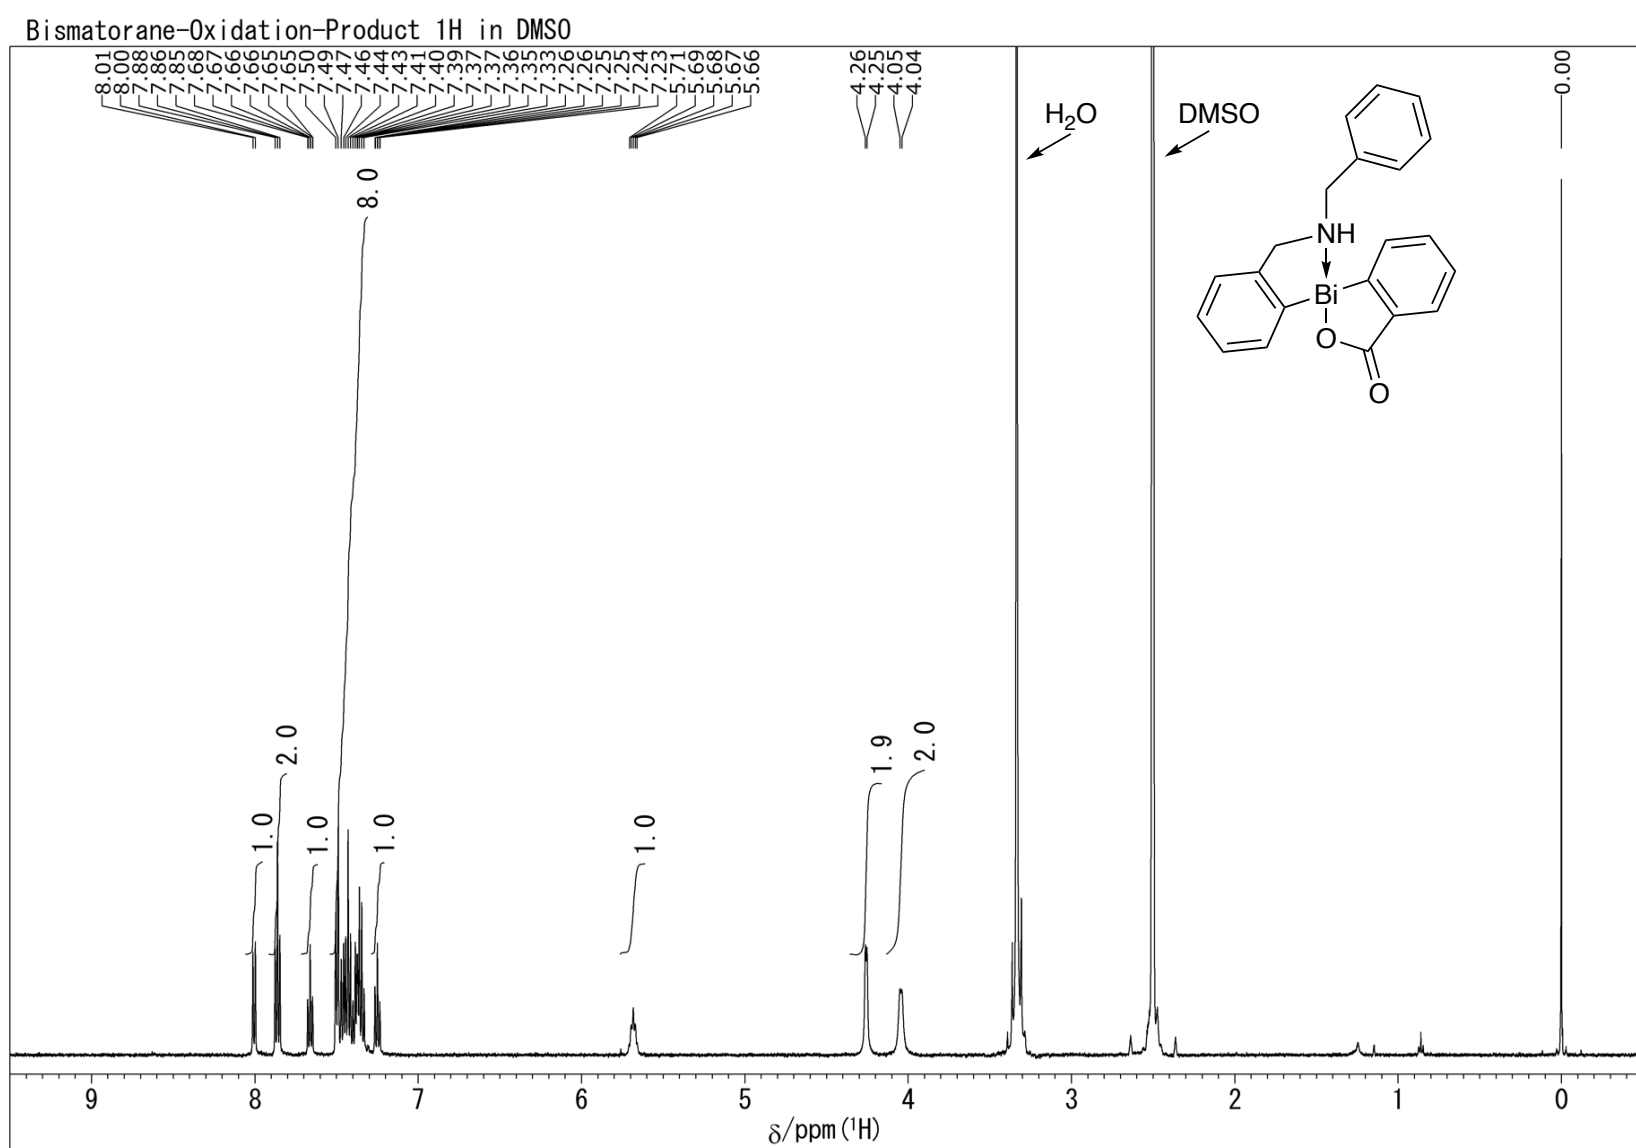

Fig. S9 <sup>1</sup>H NMR (DMSO-*d*<sub>6</sub>, 499.1 MHz) spectrum of compound 5.

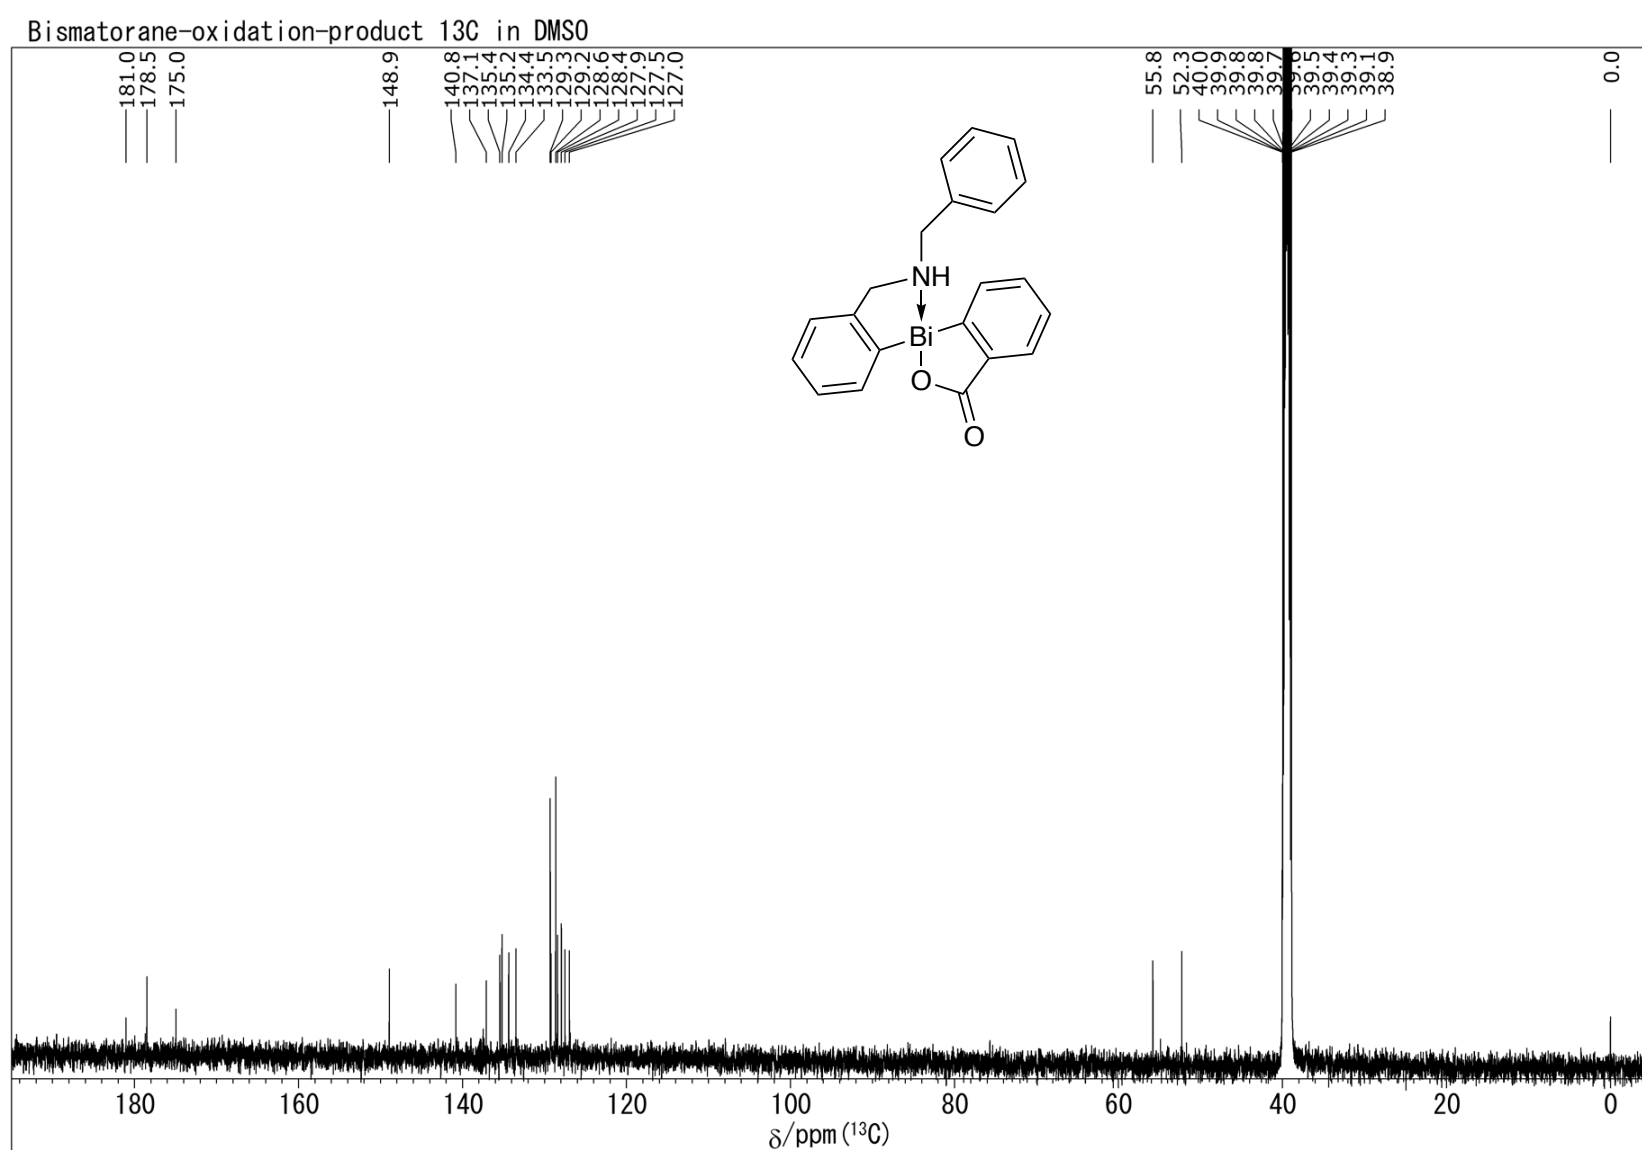

Fig. S10 <sup>13</sup>C NMR (DMSO-*d*<sub>6</sub>, 125.4 MHz) spectrum of compound 5.



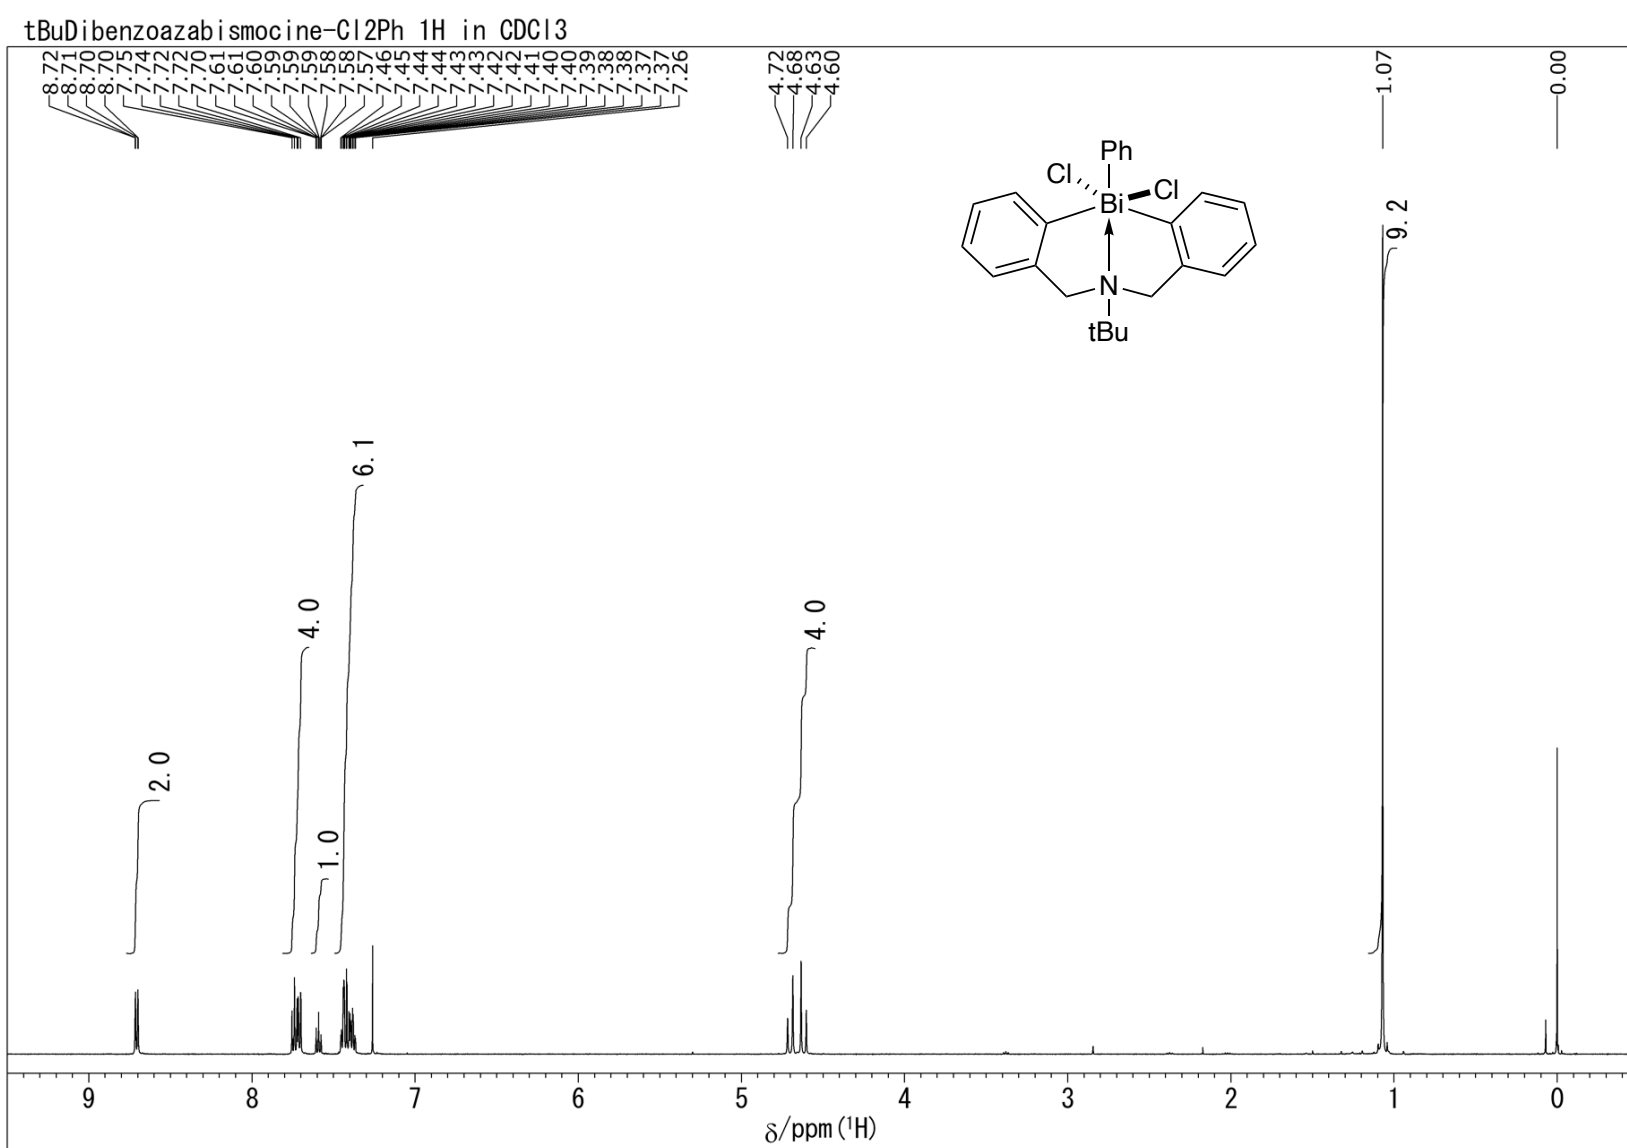

Fig. S11 <sup>1</sup>H NMR (CDCl<sub>3</sub>, 499.1 MHz) spectrum of compound 7a.

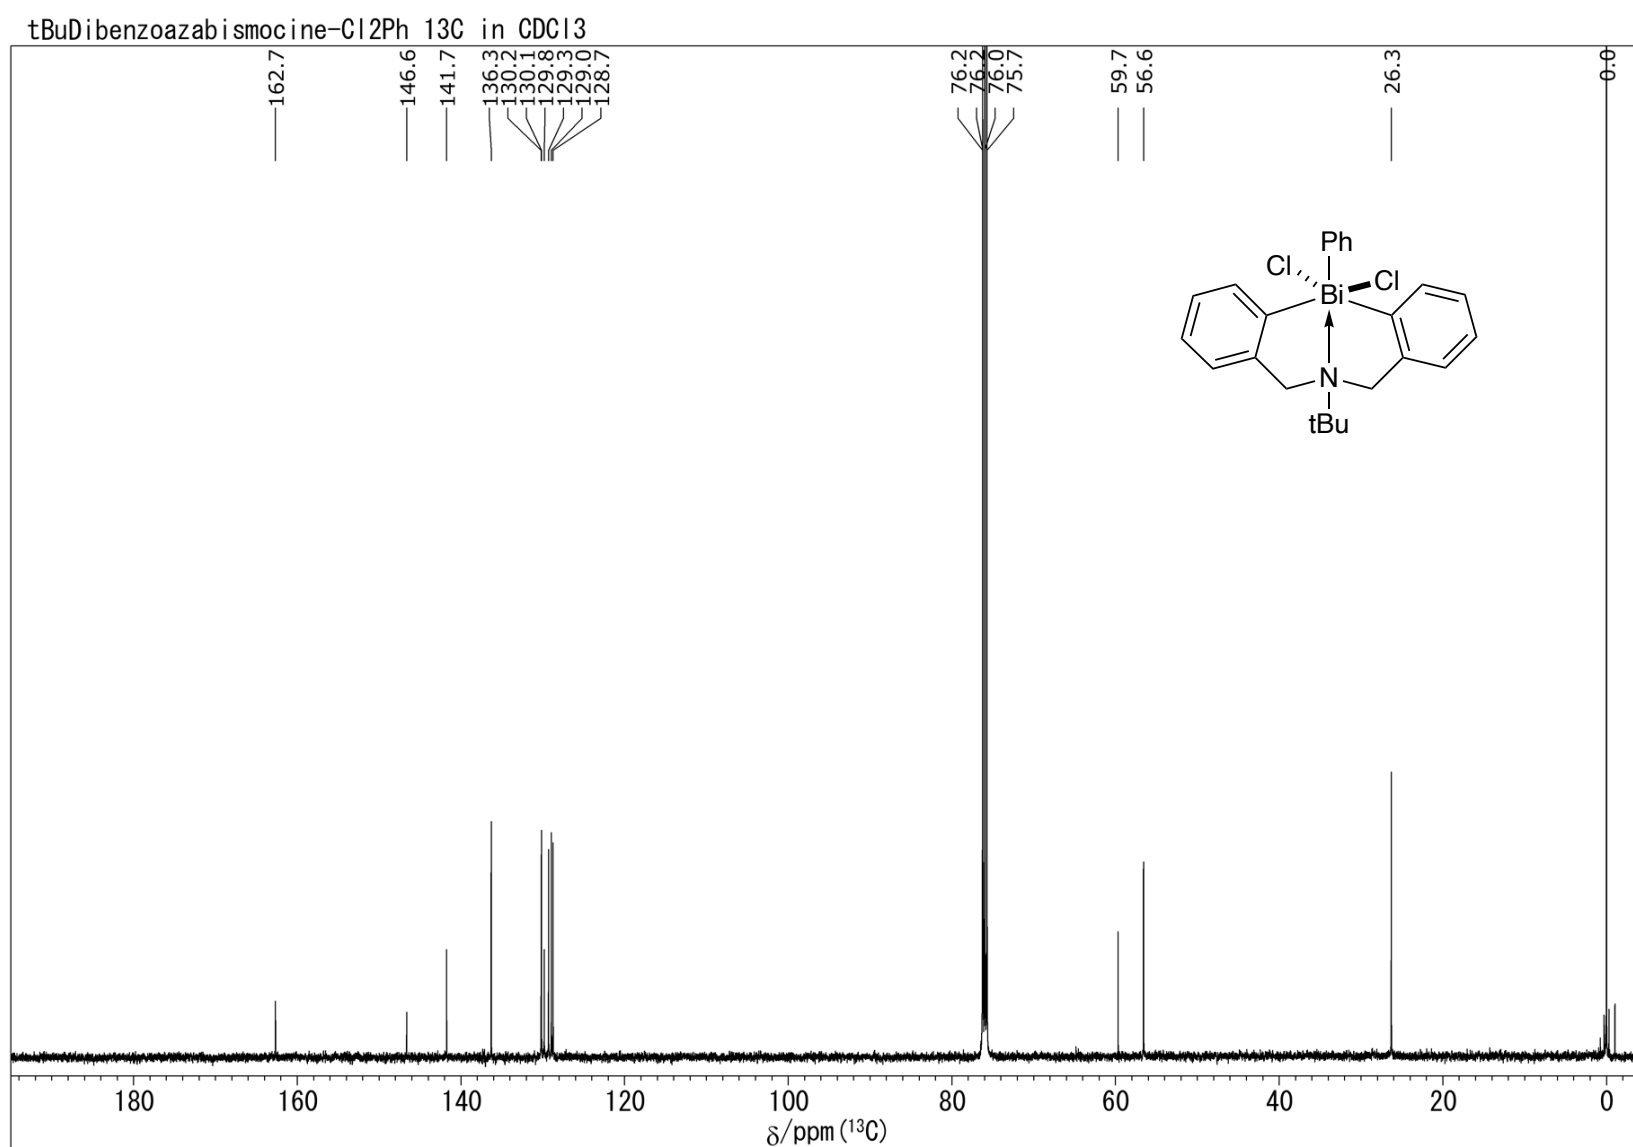

Fig. S12 <sup>13</sup>C NMR (CDCl<sub>3</sub>, 125.4 MHz) spectrum of compound 7a.

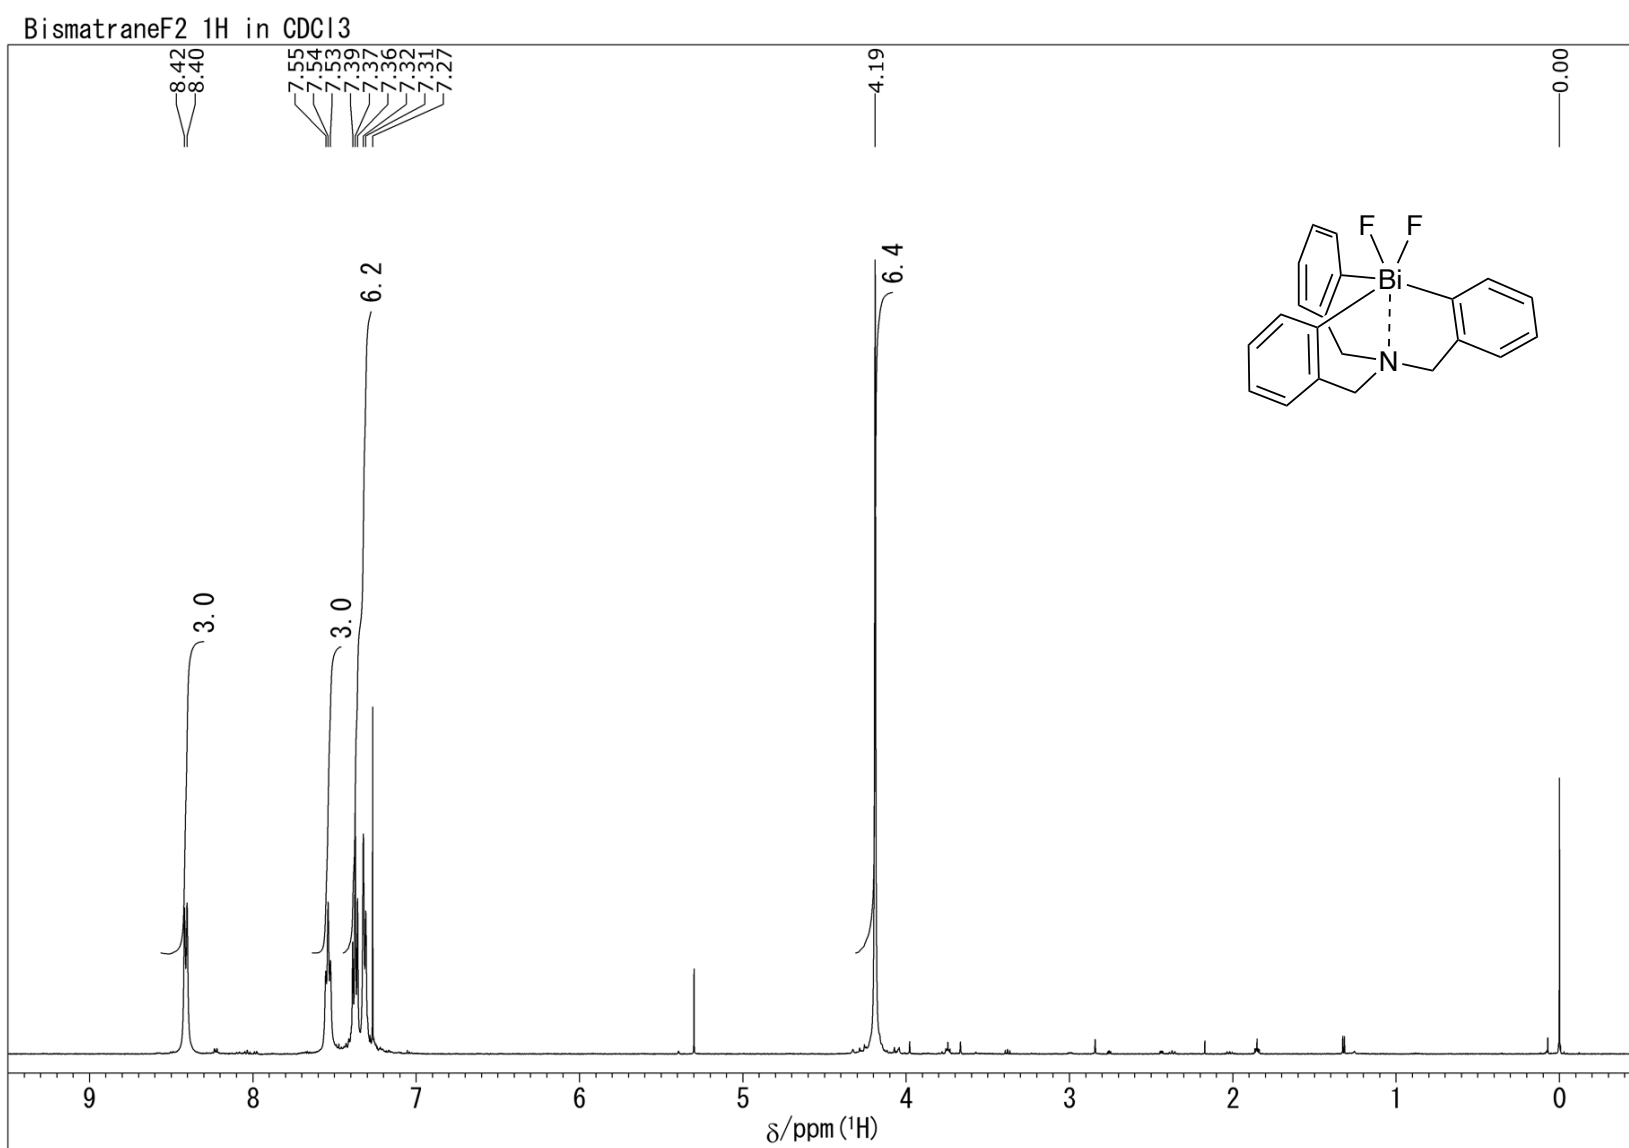

**Fig. S13**  $^1\text{H}$  NMR ( $\text{CDCl}_3$ , 499.1 MHz) spectrum of compound **8b**.

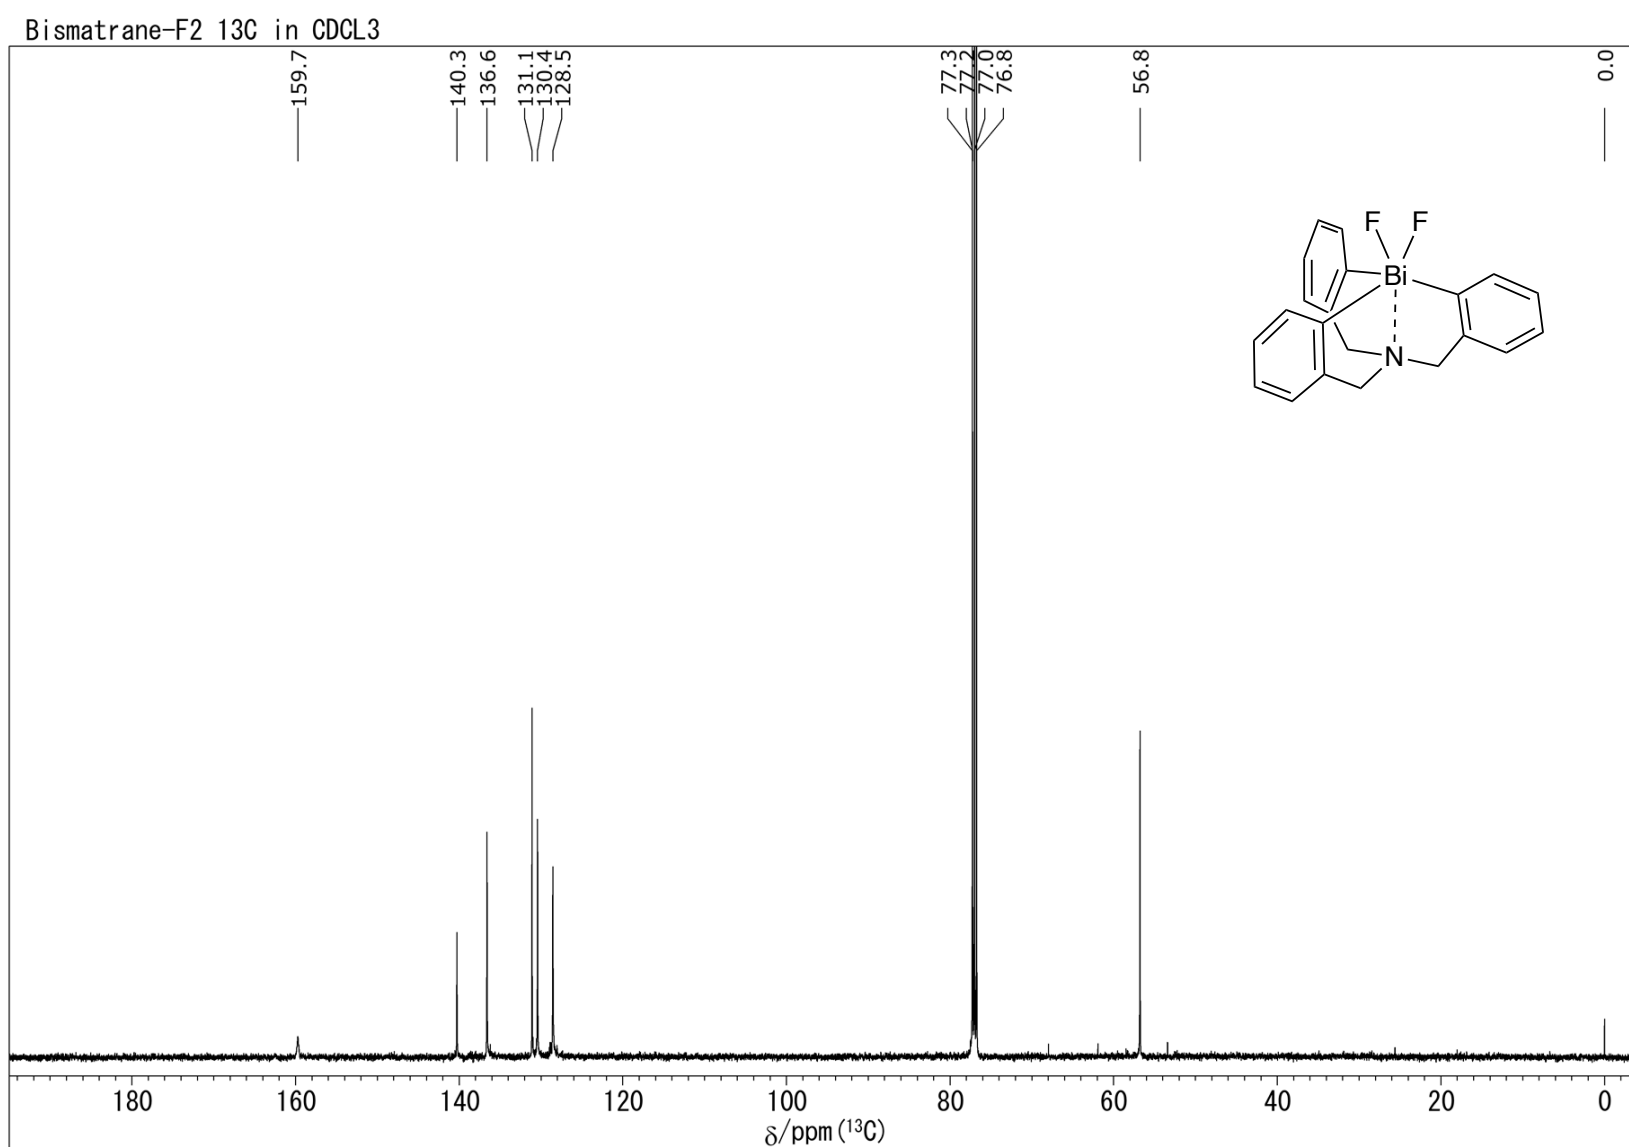

**Fig. S14**  $^{13}\text{C}$  NMR ( $\text{CDCl}_3$ , 125.4 MHz) spectrum of compound **8b**.

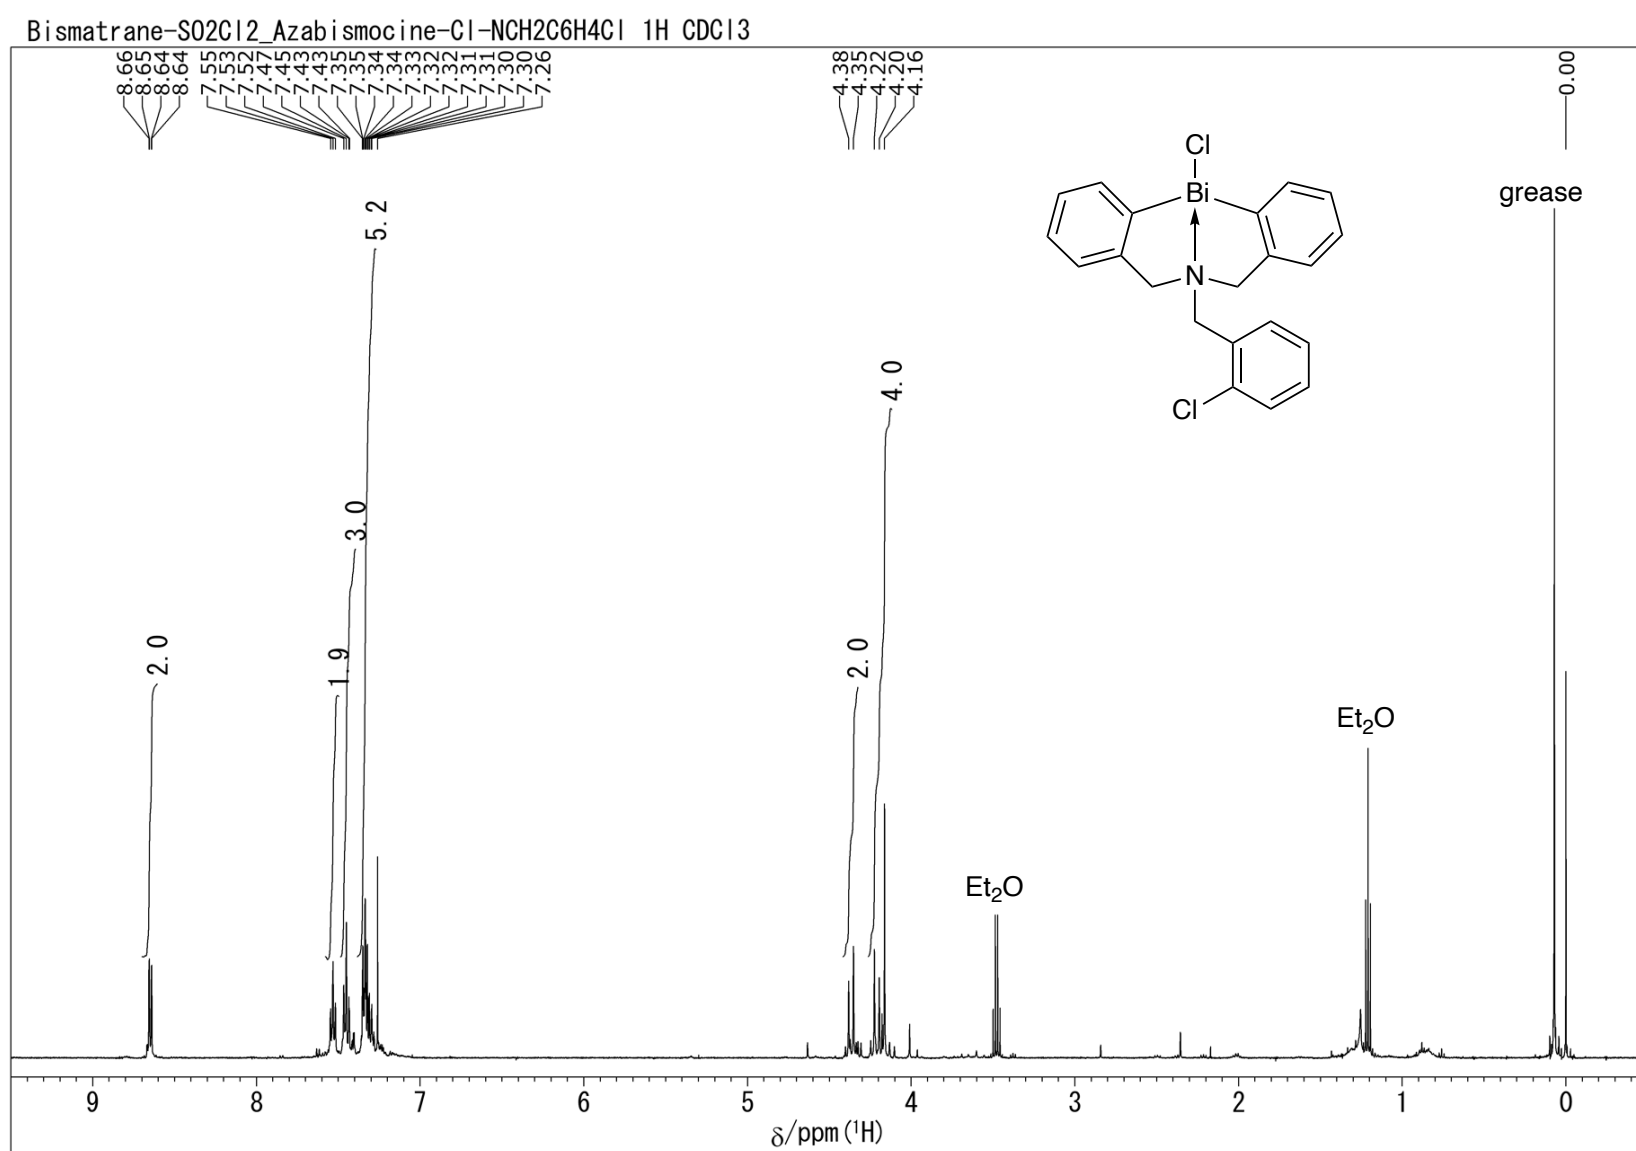

Fig. S15 <sup>1</sup>H NMR (CDCl<sub>3</sub>, 499.1 MHz) spectrum of compound 9.

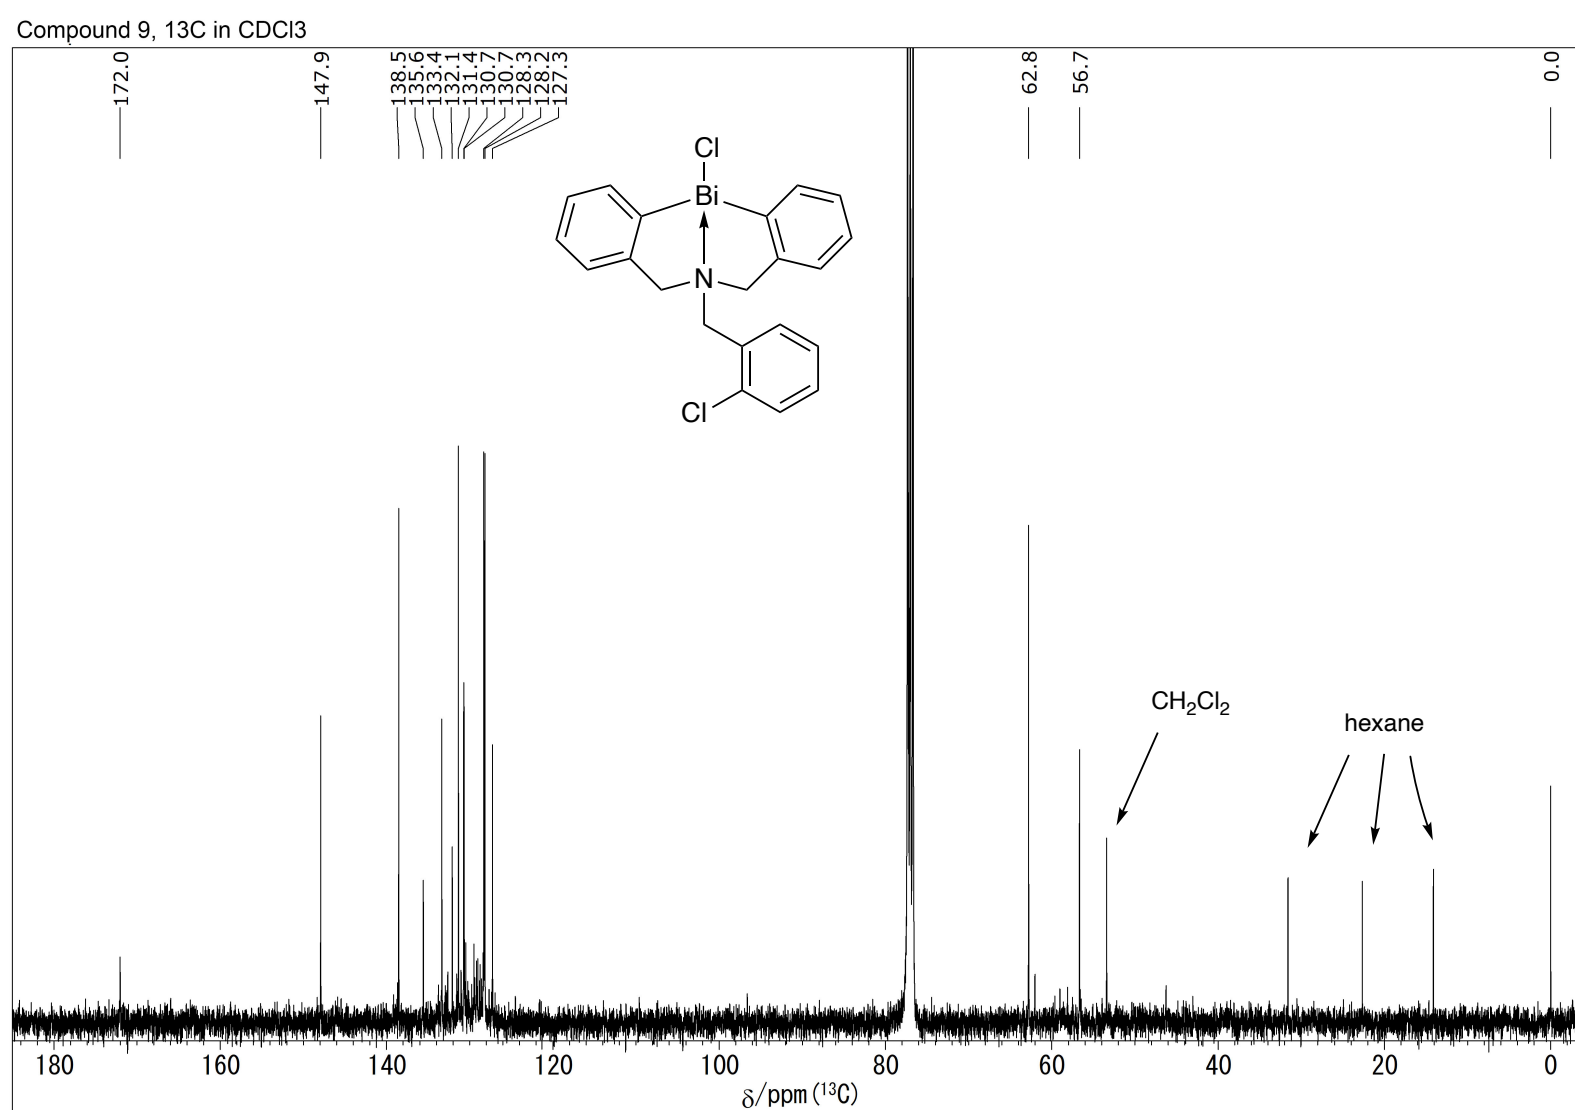

Fig. S16 <sup>13</sup>C NMR (CDCl<sub>3</sub>, 100.6 MHz) spectrum of compound 9.
